# Supplementary material for: Molecular Landscape of Pelvic Organ Prolapse Provides Insights into Disease Etiology
Source: Int J Mol Sci. 2023 Mar 23;24(7):6087. doi: 10.3390/ijms24076087 (PMC10094264; doi:10.3390/ijms24076087)
Supplement: Supplementary file 1 [file ijms-24-06087-s001.zip]

Archive with 6 entries (6 files):
- ijms-2158288-supplementary/Supplementary Information.pdf
- ijms-2158288-supplementary/Supplementary Table S1.pdf
- ijms-2158288-supplementary/Supplementary Table S2.xlsx
- ijms-2158288-supplementary/Supplementary Table S3.xlsx
- ijms-2158288-supplementary/Supplementary Table S4.xlsx
- ijms-2158288-supplementary/Supplementary Table S5.pdf
