# Supplementary material for: Molecular Landscape of Pelvic Organ Prolapse Provides Insights into Disease Etiology
Source: Int J Mol Sci. 2023 Mar 23;24(7):6087. doi: 10.3390/ijms24076087 (PMC10094264; doi:10.3390/ijms24076087)
Supplement: Supplementary file 1 [file ijms-24-06087-s001.zip › ijms-2158288-supplementary/Supplementary Table S2.xlsx]

## Sheet: Table S2
Gene	FC	P value	Corr P value
A4GALT	1.30807	4.12134e-05	0.00333485		All genes with differential expression between POP and non-POP tissues of 12 premenopausal women with POP and a corrected P-value < 0,01
AADAT	-1.24674	5.13893e-05	0.00380183
AAED1	1.51504	5.03373e-07	0.000486934
AARS2	-1.21277	1.05501e-05	0.00165289
ABCB4	1.28551	1.10182e-06	0.000645958
ABCC5	-1.33945	0.000272019	0.00879517
ABCG2	-1.34887	5.67089e-05	0.00398656
ABHD10	-1.18495	6.06812e-05	0.00406355
ABL2	1.81637	4.38228e-07	0.000486934
ACAP1	-1.24851	5.57446e-06	0.00124611
ACKR3	1.69081	0.000102425	0.00552526
ACSS1	-1.20937	0.000329394	0.00994093
ACTA1	3.43758	4.31652e-05	0.0034252
ACYP1	-1.19084	0.000229796	0.00801843
ADA2	1.19652	0.00022927	0.00801843
ADAMTS1	2.20548	0.000172249	0.00698023
ADGRL2	1.30559	2.98348e-05	0.00286119
AEN	1.26466	0.000190636	0.00736156
AHI1	1.15656	4.89096e-05	0.00368864
AKIRIN1	1.30577	1.53123e-05	0.00208146
AKR1C1	1.55274	0.000173947	0.00700594
AKR1C2	1.55274	0.000173947	0.00700594
AKR1C3	1.37731	0.000253204	0.00839653
ALCAM	1.42785	0.000165343	0.00687475
ALDH9A1	-1.18804	0.000102223	0.00552396
ALKBH4	-1.21677	0.000186866	0.00728519
AMOTL1	1.33325	2.91693e-05	0.00282351
AMY1C	-1.25768	8.21585e-05	0.00489047
ANGEL1	-1.15046	0.000281844	0.00899122
ANK3	1.62182	1.48857e-05	0.00205569
ANKAR	-1.34017	1.35135e-05	0.00191731
ANKFY1	-1.22473	0.000157715	0.00674283
ANKRD37	1.9684	2.34657e-05	0.00258607
ANKRD49	-1.19269	0.000177338	0.00708257
AP4B1	-1.16715	3.14916e-05	0.00294731
APOLD1	2.95723	5.0516e-05	0.00377156
AREG	3.18841	3.05968e-05	0.00289745
ARG2	1.38379	0.000315564	0.00969138
ARHGAP10	1.35843	0.000183356	0.00723341
ARHGAP18	-1.33248	0.000142011	0.00644983
ARID5A	2.6689	4.89277e-07	0.000486934
ARID5B	1.36368	9.8247e-05	0.00541629
ARL4A	-1.32813	0.000129618	0.00612868
ARMC5	1.2102	0.000315422	0.00969138
ARMC7	-1.18554	5.80525e-05	0.00399024
ARMCX2	-1.25281	0.000171257	0.00697932
ASB7	-1.20419	7.65799e-05	0.00466567
ASXL3	-1.28013	0.000326353	0.0098769
ATAD2B	-1.20325	0.000229931	0.00801843
ATAT1	-1.15337	0.000300857	0.00943314
ATF3	1.53404	0.000123566	0.00602737
ATF4	1.21587	0.000168379	0.0069186
ATF7	1.15565	0.000211365	0.00774472
ATF7IP2	-1.20823	8.00616e-05	0.00480793
ATP1B3	1.23634	0.000225597	0.0079792
ATP2A3	1.35149	0.000183744	0.0072361
BAG3	1.50289	4.03565e-05	0.0033086
BBS10	-1.25331	0.000252103	0.008394
BCL7B	1.16339	2.28112e-05	0.00256808
BDKRB2	1.89946	5.22678e-05	0.00383284
BICD1	1.23766	2.02399e-06	0.000831361
BMP8B	1.4753	0.000127911	0.00612868
BORCS6	-1.20358	9.90374e-05	0.00541776
BRF2	-1.34815	0.00022509	0.0079792
BTN3A1	-1.1986	0.000172304	0.00698023
BTN3A3	-1.17988	0.000280023	0.00894231
C10orf76	1.23016	0.000256026	0.00844505
C11orf21	-1.36669	2.40151e-05	0.00259097
C11orf96	2.36731	0.000129428	0.00612868
C12orf73	-1.2664	0.000203409	0.00756927
C16orf70	-1.15982	8.6557e-06	0.00151949
C5orf56	-1.37187	6.15096e-05	0.00408327
C8orf44	-1.24359	0.000153523	0.0066624
CALHM5	1.30639	0.000247135	0.00831059
CASKIN2	1.27733	0.000135488	0.00627405
CCBE1	-2.54706	2.24669e-08	0.000116348
CCDC8	-1.26146	0.000129236	0.00612868
CCNA2	-1.11989	0.00027191	0.00879517
CCND2	1.29293	2.56572e-05	0.00263803
CD44	2.27961	7.66237e-07	0.000580695
CD58	1.24217	7.21367e-05	0.00447421
CDAN1	-1.14813	0.000192598	0.00737976
CDC73	1.12551	3.45622e-05	0.00304253
CDH3	-1.6058	0.000289637	0.00918326
CDKN2A	1.44412	1.11166e-05	0.00169322
CDKN2B	1.33574	0.000103706	0.00553669
CDON	-1.76902	6.91573e-06	0.00131832
CDV3	1.20248	0.000171833	0.00697932
CEBPG	1.36005	2.09498e-05	0.00247079
CFAP45	1.37022	9.39725e-05	0.00528908
CHMP1B	1.23609	0.000163681	0.00683587
CHRNB1	-1.15876	0.000199704	0.00751235
CHST12	-1.3024	5.23114e-07	0.000486934
CHST6	1.48795	3.28811e-05	0.00298018
CLK4	-1.31646	8.55078e-05	0.00500358
CNST	1.35355	0.000138094	0.00635262
COA7	-1.21185	0.000243763	0.00823282
COLEC12	-2.63479	2.13243e-08	0.000116348
COMP	3.5265	8.97754e-05	0.00516574
COQ10B	1.32073	2.83368e-06	0.000941843
CORIN	1.60691	0.000136456	0.00629075
COX19	-1.2305	5.73491e-05	0.00399024
CPNE5	-1.63089	4.81137e-05	0.00367319
CPXM2	1.4573	0.000147551	0.00654155
CREB5	1.59001	0.000123465	0.00602737
CREM	1.52823	0.000319754	0.00975972
CROCCP3	-1.2903	0.00012736	0.00612868
CSF3	4.05137	0.000185352	0.00725717
CSNK1A1	1.25774	1.03613e-06	0.000645958
CSRNP1	3.84745	2.10108e-05	0.00247079
CUZD1	-1.2726	0.000183443	0.00723341
CYFIP2	1.59439	3.72274e-05	0.00314329
CYSLTR2	1.33212	0.00022627	0.0079792
DAAM1	1.54851	2.90763e-05	0.00282331
DCAKD	-1.16991	0.000142191	0.00644983
DCLRE1C	-1.18141	0.000115988	0.00586361
DCP2	-1.18679	0.000170586	0.00697822
DCUN1D2	-1.19945	1.8661e-05	0.00234751
DDX25	1.22984	2.29368e-05	0.00257179
DDX3X	1.28337	5.27175e-05	0.00383284
DENND6B	-1.29758	0.000112517	0.00575969
DET1	-1.41848	4.88383e-06	0.00117636
DHDDS	-1.26845	0.000124375	0.00604527
DIO3OS	-1.39508	0.000193285	0.00738282
DIRC2	1.17902	8.71443e-05	0.00506121
DLC1	1.65305	1.1488e-05	0.00169432
DMTF1	-1.27157	3.96226e-05	0.00327434
DNAJB4	1.41966	3.19944e-05	0.00295872
DNM3OS	-1.64416	2.51359e-06	0.000900866
DPH3	1.48832	1.04485e-06	0.000645958
DTD1	-1.18662	0.00022729	0.00798908
DUSP10	1.79511	3.83351e-05	0.00320201
DUSP14	1.57679	0.000168174	0.0069186
DUSP5	2.07844	0.000315643	0.00969138
DUSP8	1.59538	3.21513e-06	0.0010091
DYRK3	1.57847	0.000228772	0.00801843
EARS2	-1.31612	7.7274e-05	0.00468956
EDRF1	-1.25694	1.14817e-05	0.00169432
EED	-1.20756	0.000106353	0.0056244
EFNB1	-1.37141	2.47855e-05	0.00261951
ELK3	1.23035	0.000293425	0.0092939
ELOVL3	1.24803	4.4352e-05	0.00346258
EMID1	-1.29596	6.62747e-06	0.00129564
EMX2	-1.91624	6.1503e-05	0.00408327
EMX2OS	-2.18583	8.14555e-07	0.000602615
ENTPD1	1.32445	6.52203e-06	0.00129564
EPHB3	-1.50761	6.03413e-05	0.00404951
EPM2AIP1	-1.58426	2.13665e-05	0.00247079
EPO	-1.67509	1.00292e-05	0.00162306
EPS8L1	-1.36983	0.00013154	0.00616535
EXO5	-1.17459	4.19119e-05	0.00335641
EXOSC9	1.19911	0.000278151	0.00891921
F2R	1.52276	1.0957e-06	0.000645958
FABP4	-1.8604	5.09357e-05	0.0037863
FADD	-1.25021	7.86684e-06	0.00140482
FAM102A	-1.26462	0.000109247	0.00571754
FAM107A	1.57834	0.000135822	0.00628014
FAM107B	1.49053	7.3383e-05	0.00452412
FAM118A	1.18196	0.000279631	0.00893899
FAM133CP	1.24981	3.11296e-05	0.00292223
FAM177A1	1.30169	4.37025e-05	0.00343778
FAM19A5	-1.51831	0.000161616	0.00680145
FAM200A	-1.31919	1.12616e-05	0.00169432
FAM212A	-1.31259	2.13178e-05	0.00247079
FAM212B	1.21592	5.53766e-05	0.00393383
FAM217B	-1.32474	0.000238432	0.00815021
FAM78A	-1.46048	3.89639e-06	0.00105131
FAM83D	4.14636	1.61031e-05	0.0021143
FAM84B	-1.60027	1.44484e-06	0.000712605
FAM98B	-1.16327	0.000199379	0.00750922
FAN1	-1.22029	0.000150206	0.00658278
FANCF	-1.43645	4.83e-05	0.00367589
FBLN5	-1.40558	0.000260089	0.00856088
FEM1C	1.31668	7.66966e-06	0.00138691
FIGNL1	-1.2322	9.27099e-05	0.00528566
FLCN	-1.32009	0.000149229	0.00655849
FLRT2	-1.31725	2.2715e-05	0.00256808
FMO1	-2.15014	2.691e-06	0.000918844
FMO2	-1.68446	6.92758e-05	0.0044003
FOSL2	1.6651	6.69229e-05	0.00433967
FOXA2	1.22002	8.49129e-05	0.00497814
FOXC2	1.15309	0.000287369	0.00913
FOXL1	1.27866	0.000201423	0.00753048
FRAT2	-1.31239	0.000110204	0.00571754
FRMD5	1.27399	5.59849e-05	0.00395356
FSTL3	1.36519	0.000155204	0.00669011
FUT1	1.31173	0.00017349	0.00700088
FZD10	1.71504	0.000130509	0.00613489
FZD4	-1.24744	8.40961e-05	0.00495832
GADD45B	3.58344	0.000193647	0.00738282
GAS2L1	1.17878	3.51528e-05	0.00304253
GCNA	-1.37221	4.98992e-06	0.00118356
GDF10	-1.67243	0.000217134	0.00786293
GDF7	-2.1542	1.36331e-06	0.000691733
GIMAP1	-1.38623	0.000233177	0.00804142
GIMAP8	-1.40242	0.000172914	0.00699277
GLI1	-1.80942	3.21412e-08	0.000124836
GLP2R	-1.97318	9.57335e-06	0.00159926
GOLPH3L	-1.11994	0.000156793	0.0067384
GPR155	1.39203	1.72608e-05	0.00221623
GPR22	-1.53373	8.04623e-05	0.00480793
GPRC5A	1.84047	0.000218134	0.00786293
GPRC6A	1.211	2.32464e-05	0.00257968
GRID1	-1.4203	2.70939e-05	0.00270696
GSPT2	-1.19978	2.2446e-06	0.000859954
GUCY2GP	1.12092	0.000130292	0.00613401
GVINP1	-1.3311	2.83976e-06	0.000941843
H19	-3.92413	2.03897e-07	0.000411945
HABP4	1.2677	6.54267e-06	0.00129564
HAGH	1.19719	0.000179784	0.00714353
HAO1	1.20603	3.37453e-05	0.00302172
HAS2	1.60304	0.00026569	0.00868088
HBEGF	1.94183	6.91437e-06	0.00131832
HECW1	1.15714	3.38581e-05	0.0030231
HHIPL2	2.0067	5.8794e-06	0.0012599
HIGD1A	1.27508	0.000180318	0.0071556
HOTTIP	-1.43609	2.55137e-06	0.000900866
HOXA10	-1.32516	0.000219173	0.00786298
HOXA9	-1.53192	2.10118e-06	0.000840449
HOXB5	-1.55833	2.60152e-06	0.000902248
HPS6	-1.23325	0.000192854	0.00737976
HS3ST1	-1.48894	5.26994e-05	0.00383284
HSP90AA1	1.26372	0.00024709	0.00831059
HSPB8	1.51558	1.69008e-05	0.00217901
HUS1B	1.23194	6.3373e-05	0.00418963
ICAM1	2.61221	8.88932e-05	0.00512447
ID3	1.35329	8.04198e-05	0.00480793
ID4	1.45233	0.000111106	0.00572516
IDH1	-1.27943	0.000171297	0.00697932
IFRD1	1.46337	5.19584e-05	0.00383284
IGF2	-1.85964	1.63202e-05	0.00213068
IKZF1	-1.22221	0.00019822	0.0074905
IL2RB	-1.56688	0.000255119	0.00843303
IL6	6.54847	0.000126657	0.00611194
ISCA2	-1.26032	3.84958e-06	0.00105131
ISLR	-1.29873	6.16328e-05	0.00408327
ITFG2	-1.1942	0.000116163	0.00586361
ITGA1	1.4572	0.000161953	0.00680145
ITGA7	1.5028	0.000142353	0.00644983
ITGB3	1.51356	0.000158721	0.00674479
JDP2	1.44229	2.04515e-05	0.00247079
JMJD1C	1.27122	0.000136429	0.00629075
JUND	1.6357	1.21313e-06	0.000664905
KBTBD6	-1.35346	2.70233e-05	0.00270696
KBTBD7	-1.39948	1.36301e-05	0.00192507
KCNAB1	1.50466	0.000266352	0.00869338
KCNG1	-2.69241	0.000252317	0.008394
KCNK2	1.20396	5.81279e-05	0.00399024
KCNQ1OT1	-1.65448	6.74627e-07	0.000542367
KCTD6	-1.19791	0.000232518	0.00804142
KHDC4	-1.34389	4.54426e-05	0.00351242
KIAA0040	1.37871	5.7195e-05	0.00399024
KIF1C	1.16438	0.000296854	0.0093505
KIF5B	1.24718	1.11923e-05	0.00169432
KLF10	1.59273	0.000167037	0.0069186
KLF11	1.2374	0.000217561	0.00786293
KLF14	1.26164	0.000295425	0.00931922
KLF7	1.3376	0.000196787	0.00745678
KLF9	1.62927	0.000288823	0.00916681
KLHL13	-1.60336	2.05965e-05	0.00247079
KLHL4	-1.27621	4.83857e-05	0.00367589
KLHL9	-1.20994	0.000187783	0.00731176
KLK15	1.24743	0.000160635	0.00679082
KLRG1	-1.3433	7.86071e-05	0.00474268
KRTAP6-3	1.58043	0.000128672	0.00612868
L1CAM	1.2565	5.27838e-05	0.00383284
L3MBTL1	-1.23054	0.000104318	0.0055598
LARP1B	1.1371	4.50982e-05	0.00349449
LDLR	1.40561	4.48438e-06	0.00114212
LEFTY2	-1.67834	9.90604e-06	0.00162306
LINC00461	-1.57538	7.6815e-06	0.00138691
LINC00894	-1.32735	6.93919e-05	0.0044003
LMNA	1.5286	1.67701e-05	0.00217117
LMO3	-1.57732	0.000157404	0.00674283
LOC100129455	1.2132	0.000131553	0.00616535
LOC105372255	-1.53646	4.59513e-07	0.000486934
LOC400684	-1.2451	0.000144538	0.00648999
LOC728743	-1.26952	2.11973e-05	0.00247079
LPAR6	-1.45768	3.07723e-05	0.00289745
LRP1B	1.5511	0.000116136	0.00586361
LRRC8C	1.25196	0.000267276	0.00870525
LRRFIP1	1.89314	4.63629e-07	0.000486934
LURAP1L	1.26612	9.31838e-05	0.00528908
MAF	-1.34902	5.37289e-05	0.00385855
MAFF	2.60292	0.000233391	0.00804142
MAFK	1.46502	2.45892e-05	0.00261951
MAGEA3	1.36945	0.000148094	0.0065536
MAGEA6	1.36945	0.000148094	0.0065536
MAML2	1.32379	4.91757e-05	0.00369973
MAP10	-1.20166	8.38545e-05	0.00495347
MAPT	1.32029	0.000271964	0.00879517
MBTD1	-1.45046	2.57155e-05	0.00263803
MCM9	-1.34538	3.4767e-05	0.00304253
MCTP1	1.57395	1.60231e-06	0.000743089
MDK	-1.78604	3.19407e-05	0.00295872
MED21	1.19227	1.62724e-06	0.000743551
MEN1	-1.17278	4.64434e-07	0.000486934
MFSD4B	-1.25627	0.000147581	0.00654155
MGLL	1.33619	6.05936e-07	0.000508855
MIDN	1.38707	0.00030398	0.00949272
MLC1	1.75659	5.92448e-05	0.0040218
MLF1	1.77345	2.10978e-06	0.000840449
MME	2.35911	1.8286e-05	0.00231912
MS4A2	-1.6046	0.000297921	0.0093505
MSANTD3	1.24306	4.10968e-05	0.0033341
MSI1	1.17731	5.33949e-05	0.00384939
MSX2	1.50462	9.55997e-06	0.00159926
MSX2P1	1.60138	5.48154e-05	0.00391546
MT2A	1.82139	0.000231862	0.00804142
MYEF2	1.26319	5.8216e-05	0.00399024
MYO5A	1.30443	6.62611e-06	0.00129564
MYRFL	1.26513	0.000316952	0.00972195
NAALAD2	-1.20975	4.15995e-05	0.00334865
NAMPT	2.27989	0.000310735	0.00962627
NANOG	-1.44032	8.33694e-05	0.00494361
NANOS3	1.27429	0.000100384	0.00545033
NAPEPLD	-1.36949	6.67479e-05	0.00433967
NAPG	1.17743	0.000145825	0.00651658
NAT2	-1.22032	4.35964e-05	0.00343778
NECTIN2	1.31625	0.000208176	0.00769463
NEDD9	2.01426	3.64162e-06	0.00104534
NEURL1	-1.90085	3.28978e-05	0.00298018
NFATC2	2.34527	6.94846e-07	0.000542367
NFIL3	2.15287	0.000297827	0.0093505
NHEJ1	-1.15995	7.16359e-05	0.00446067
NKG7	-1.47013	0.000311848	0.00965114
NLRC4	-1.28062	0.00028239	0.00899942
NR4A2	2.72722	0.000221236	0.00789526
NR4A3	4.46651	9.10252e-06	0.0015713
NSUN5	-1.19134	0.0001102	0.00571754
NSUN5P2	-1.24527	0.000175152	0.00703144
NTF3	1.29375	5.89014e-05	0.00401357
ODF3L1	1.66834	9.47865e-06	0.00159926
OGG1	-1.20063	8.99961e-06	0.00156221
OR2B2	1.23578	7.72191e-06	0.00138691
OR7A2P	1.1818	7.40988e-05	0.0045592
OR7E156P	1.23951	4.12875e-07	0.000486934
OR7E24	1.20702	2.13283e-05	0.00247079
OR7E47P	1.34053	5.93089e-05	0.0040218
OSMR	1.25884	0.000242681	0.00821415
OTOS	1.30161	0.000249664	0.00834145
OXSM	-1.2752	2.57913e-05	0.00263803
PAFAH1B3	-1.2673	9.50385e-05	0.00531122
PARP16	-1.21742	4.0983e-05	0.00333357
PARS2	-1.47123	3.55545e-06	0.00104534
PCDH18	-1.46112	3.44023e-05	0.00304253
PCDHGC4	1.28669	6.73616e-06	0.00130816
PDE11A	-1.96758	9.56941e-05	0.00533825
PDE5A	1.49396	0.00024665	0.00831059
PDGFRB	1.23529	9.89116e-05	0.00541776
PDLIM1	1.49297	1.08268e-06	0.000645958
PDLIM3	2.31365	2.13904e-05	0.00247079
PEA15	1.18018	0.000149174	0.00655849
PEX11B	-1.24013	0.000144479	0.00648999
PEX12	-1.40898	1.61267e-05	0.0021143
PIGA	1.32773	6.86383e-05	0.00437125
PJA1	-1.19683	9.40912e-05	0.00528908
PJVK	-1.2588	0.000222544	0.00791562
PLEKHF1	-1.22271	9.7478e-05	0.00539899
PLEKHJ1	-1.24262	7.55535e-06	0.00138691
PLK1	-1.20474	0.000113731	0.00580269
PLK3	2.23668	2.36207e-05	0.00258607
PLXNA2	1.31407	0.000118889	0.00589175
PMEL	-2.91067	0.000177043	0.0070799
PMS2P10	-1.40448	4.13943e-05	0.00334079
PNP	1.30067	0.000158721	0.00674479
PPARGC1A	1.43634	0.000217636	0.00786293
PPAT	-1.16022	7.72635e-05	0.00468956
PPIL2	1.22727	0.000206479	0.00766513
PPP1R15B	1.48439	6.15638e-05	0.00408327
PPP1R3E	-1.2983	4.82123e-06	0.00117636
PPP1R9A	1.34472	0.000219016	0.00786298
PRICKLE2	-1.25581	0.000149113	0.00655849
PRKAG2	1.29197	0.000166874	0.0069186
PRMT6	-1.27959	2.61336e-06	0.000902248
PRPF39	-1.22541	0.000176832	0.0070799
PRPS2	-1.34302	5.53838e-05	0.00393383
PSMD12	1.1689	0.000277203	0.00889913
PTCD2	-1.26529	0.00025302	0.00839653
PTGDR2	-1.20161	6.28264e-06	0.00129564
PTH1R	-1.2523	0.000168007	0.0069186
PTMA	1.22584	1.29013e-06	0.000679441
PTN	-1.68689	6.87583e-06	0.00131832
PTPN11	1.2045	1.53847e-06	0.000734086
PVR	1.24238	0.000191853	0.00737778
PWWP2B	-1.23479	4.18548e-05	0.00335641
PXDC1	1.32677	2.12385e-05	0.00247079
PYY2	1.4304	0.000174572	0.00701721
QPRT	-1.25251	0.000110169	0.00571754
RAB21	1.23411	2.57832e-05	0.00263803
RAB27A	1.22778	0.000322826	0.00980532
RAB32	1.35911	2.54505e-06	0.000900866
RAD54B	-1.26262	5.63919e-06	0.00125158
RALGDS	1.63131	0.000121512	0.00596722
RAP1B	1.26638	5.0616e-05	0.00377156
RBM12B	-1.23414	0.00020332	0.00756927
RBM4B	-1.22557	9.9125e-06	0.00162306
RBM5	-1.19093	5.78383e-05	0.00399024
RBP5	-1.3593	0.000126676	0.00611194
RCAN1	2.48565	3.42101e-06	0.00104213
RCAN3	1.32399	0.000221744	0.00790139
RCBTB2	-1.18702	0.000142489	0.00644983
RDH10	1.45368	4.24445e-05	0.00338433
RHEX	-1.72593	0.000162633	0.00681962
RHOB	1.55786	1.41591e-05	0.00198176
RHOQ	1.34004	0.000295183	0.00931922
RIMKLB	1.37587	4.80737e-05	0.00367319
RIPK1	1.43815	0.000267674	0.00870907
RIPK2	1.21867	6.60019e-05	0.00433967
RLIM	1.33011	2.0568e-05	0.00247079
RMI1	-1.41182	1.34773e-05	0.00191731
RND2	1.41899	1.91002e-05	0.00239308
RND3	2.28848	2.84929e-06	0.000941843
RNF122	2.7126	4.87701e-05	0.00368864
ROR1	-1.41528	7.6017e-06	0.00138691
RORC	1.22627	0.000308771	0.00959414
RPAIN	-1.37283	4.49058e-05	0.00348828
RPP25L	-1.18415	0.000277011	0.00889913
RPUSD2	-1.36687	1.21973e-06	0.000664905
RSRP1	-1.24114	9.44884e-05	0.00529954
RTP4	-1.29574	0.000152434	0.00663364
RXRA	-1.32316	2.88211e-05	0.0028073
SALL3	2.23208	2.95337e-06	0.00096597
SBDS	1.27351	9.38562e-07	0.000645958
SCCPDH	1.20926	4.11953e-06	0.00107478
SCD5	1.1792	3.86602e-05	0.00322051
SCYL3	-1.17366	0.000277016	0.00889913
SDC2	1.45842	1.03813e-05	0.00165289
SDE2	1.27019	0.00010484	0.00557805
SEMA5B	1.40467	0.000182326	0.00721686
SENP8	-1.18767	0.00032658	0.0098769
SERPINB8	1.44477	0.000151409	0.00661684
SERPINE1	2.08547	1.80676e-06	0.000812178
SERTAD1	2.37399	5.23676e-05	0.00383284
SF3B3	-1.14451	9.85864e-05	0.00541629
SH3BP4	1.31106	6.80408e-05	0.00435593
SIRT4	-1.33834	1.55114e-05	0.00208645
SIX1	2.75929	2.10344e-05	0.00247079
SIX3	1.33498	0.000207245	0.0076844
SKI	1.21516	0.000309586	0.00960984
SKIL	1.31723	5.30024e-05	0.00383284
SLC13A3	-1.33114	3.01961e-06	0.000977347
SLC13A4	-1.1176	0.000232299	0.00804142
SLC16A9	-1.33639	3.2422e-05	0.00298018
SLC19A2	1.66602	3.64164e-05	0.00310009
SLC2A1	-1.71277	8.44663e-05	0.00497072
SLC2A14	2.68679	5.82945e-05	0.00399024
SLC40A1	-1.94738	4.87782e-07	0.000486934
SLITRK6	2.04315	3.78874e-06	0.00105131
SLK	1.14841	0.000160535	0.00679082
SLN	2.61255	6.99405e-05	0.00441139
SLX4IP	1.31793	9.99068e-05	0.00543661
SMAD1	-1.92695	1.84099e-08	0.000116348
SMAD7	1.37421	0.000262532	0.00860149
SMARCAD1	-1.18473	0.00023533	0.00809765
SMPD3	-1.28081	7.81773e-05	0.00472592
SNAI1	2.3892	1.44228e-05	0.00200962
SNED1	-1.27832	3.88448e-05	0.00322724
SNHG10	-1.25473	0.000191427	0.00737051
SNHG21	-1.33928	3.35331e-06	0.00103162
SOD2	1.60485	0.000215588	0.00783479
SORCS2	-1.56508	0.000295167	0.00931922
SOX4	-1.53486	2.8505e-05	0.00279403
SPAG9	1.1349	8.84412e-05	0.0051174
SPATA13	1.32512	0.000181806	0.00720544
SPATA5L1	-1.19201	0.000106865	0.00563753
SPHK1	1.44438	0.000207553	0.00768664
SPIN3	-1.2454	3.58047e-05	0.00305922
SPTSSA	1.26995	1.55927e-06	0.000734086
SREBF1	-1.31228	3.99183e-06	0.00105131
SRGAP1	-1.2189	0.000143575	0.00647482
SRSF10	-1.18302	0.000220795	0.00789475
SSH1	1.31671	0.000201213	0.00753048
SSR1	-1.19535	0.000243727	0.00823282
SSTR2	1.94483	0.000202109	0.00753893
ST6GALNAC5	1.55732	9.26766e-06	0.00157662
STK17A	1.36889	1.08577e-05	0.00166192
STK17B	1.45639	0.000297696	0.0093505
STK32B	-1.22363	0.000317748	0.00973674
STK38L	1.48508	2.03345e-06	0.000831361
STX1A	-1.30225	2.3955e-05	0.00259097
SVEP1	-1.5667	6.68251e-05	0.00433967
SWAP70	1.24822	2.63586e-05	0.00267652
SYNPO2	1.64614	9.967e-05	0.00543324
SYT1	1.47001	0.000320858	0.00977421
SYT3	1.23884	0.000198406	0.0074905
SYVN1	-1.15347	0.000220194	0.00788234
TAF13	1.4626	6.45642e-06	0.00129564
TAGLN2	1.41031	5.33406e-06	0.00124088
TARID	-1.30991	0.000197759	0.0074845
TBC1D9B	-1.11008	0.000161661	0.00680145
TCP11L2	1.41746	8.65991e-05	0.00504842
TEDC1	1.83088	4.52391e-06	0.00114282
TEFM	-1.17871	0.000114115	0.00581274
TGDS	-1.26275	0.000179088	0.00713414
TGFB2	1.6843	3.27794e-06	0.00101852
TGFBR1	1.41353	0.000178633	0.00712514
THBD	2.10925	5.29898e-05	0.00383284
TIGD2	-1.26603	0.000242154	0.00820524
TIGD5	-1.374	2.57743e-07	0.000421504
TIGD6	-1.18447	0.000109082	0.00571754
TM4SF1	1.20332	0.000313325	0.00967844
TMEM121B	-1.30354	0.000155328	0.00669011
TMEM186	-1.18045	0.000286573	0.00911402
TMEM243	-1.26394	2.27529e-05	0.00256808
TMEM42	-1.25344	8.28825e-05	0.00492414
TNC	2.20179	3.63194e-06	0.00104534
TNFRSF10D	1.39947	3.58142e-05	0.00305922
TNFRSF12A	3.10532	4.08185e-07	0.000486934
TNFRSF8	-1.19579	0.00030295	0.00947962
TNNT3	-1.4298	0.000117527	0.00587493
TP53INP2	1.39823	0.000270744	0.00878865
TPI1	1.40582	9.40419e-05	0.00528908
TPM4	1.34298	8.60429e-05	0.00502542
TRAF3IP3	-1.42632	0.000119861	0.00593047
TRAPPC10	-1.15079	0.000235664	0.00810016
TRAPPC2B	1.21025	5.12888e-05	0.00380183
TRIB1	3.06966	1.09358e-06	0.000645958
TRIM13	-1.14762	0.00015825	0.00674479
TRIM27	-1.15942	0.000186823	0.00728519
TRIM32	-1.2333	3.91245e-05	0.0032418
TRIM52	-1.21138	6.70392e-05	0.00433967
TRMT13	-1.24474	0.000221317	0.00789526
TRO	-1.32312	0.000159112	0.00674479
TSC22D4	-1.16112	4.24784e-05	0.00338433
TSHZ2	-1.25882	3.50128e-05	0.00304253
TTC9C	-1.22264	0.000134623	0.00624826
TTLL7	1.43921	0.000266864	0.00870095
TUB	-1.24291	7.07455e-05	0.00441406
TUBAL3	2.26656	5.83156e-05	0.00399024
TUBB4A	1.31869	0.000240135	0.00818142
TWISTNB	1.20823	3.58379e-05	0.00305922
TXNIP	-1.3842	8.37376e-05	0.00495347
UFM1	1.21716	5.37704e-05	0.00385855
USP12	1.25176	7.29258e-05	0.00450491
USP13	1.24241	0.000117715	0.00587493
USP49	-1.14779	0.000157313	0.00674283
VCAN	1.71726	0.000168504	0.0069186
VPS37B	1.30387	1.32776e-05	0.0019012
WDR5B	-1.28129	0.000161242	0.00680145
WDR75	-1.14305	0.000186319	0.00728215
WDR81	-1.16845	0.000210929	0.00774472
WEE1	2.04087	1.58748e-08	0.000116348
WISP1	-1.49535	0.000152422	0.00663364
WT1-AS	-1.57584	3.28299e-05	0.00298018
WWTR1	1.36187	9.34431e-05	0.00528908
XKR8	-1.22434	0.000157981	0.00674283
XRCC4	1.14052	0.00014488	0.00649596
YBX3	1.44514	1.54073e-05	0.00208146
YOD1	-1.15338	5.84308e-05	0.00399024
YPEL2	1.2984	1.15339e-05	0.00169432
ZADH2	-1.64095	3.69638e-06	0.00104534
ZBTB3	-1.28779	7.47233e-05	0.00457395
ZBTB33	-1.18485	2.30546e-05	0.00257179
ZBTB34	-1.163	0.000254255	0.00842242
ZBTB8A	-1.15812	0.000120732	0.00595456
ZBTB9	-1.18462	6.64415e-05	0.00433967
ZC3H12A	2.09155	4.46224e-05	0.00347495
ZC3HAV1L	-1.16672	0.000222907	0.00791562
ZFP62	-1.2893	0.000132199	0.00617699
ZFP82	-1.34919	3.07139e-07	0.000477171
ZKSCAN1	-1.17248	0.000190957	0.00736156
ZKSCAN3	-1.25657	0.000273299	0.0088274
ZKSCAN4	-1.20499	0.000173064	0.00699277
ZKSCAN7	-1.46472	9.28557e-06	0.00157662
ZNF132	-1.25375	1.9679e-05	0.00245276
ZNF133	-1.25551	1.53663e-05	0.00208146
ZNF14	-1.29772	4.89035e-05	0.00368864
ZNF177	-1.41967	9.9369e-06	0.00162306
ZNF18	-1.17584	0.000133058	0.00620776
ZNF184	-1.27336	3.16268e-05	0.00295107
ZNF189	-1.12242	6.73365e-05	0.00434083
ZNF202	-1.28358	1.5718e-05	0.00209865
ZNF212	-1.21302	6.47895e-05	0.00427418
ZNF214	-1.29975	3.78746e-05	0.00318065
ZNF215	-1.27921	0.000192588	0.00737976
ZNF223	-1.17356	0.000227234	0.00798908
ZNF234	-1.28045	4.41136e-05	0.00345264
ZNF276	-1.20089	1.58361e-05	0.00210281
ZNF284	-1.24583	0.000142605	0.00644983
ZNF30	-1.45028	2.25986e-06	0.000859954
ZNF398	-1.18806	7.03804e-05	0.00441177
ZNF416	-1.29503	2.62246e-05	0.00267164
ZNF417	-1.20633	0.000200837	0.00753048
ZNF587	-1.20633	0.000200837	0.00753048
ZNF419	-1.21632	1.04988e-05	0.00165289
ZNF439	-1.2691	9.69597e-05	0.00538599
ZNF449	-1.22113	0.000118234	0.00588603
ZNF454	-1.21587	9.06569e-05	0.00519478
ZNF485	-1.2858	4.77524e-06	0.00117636
ZNF490	-1.24076	0.000126526	0.00611194
ZNF500	-1.33627	5.75462e-05	0.00399024
ZNF514	-1.25691	0.000188183	0.00731518
ZNF526	-1.34001	1.01641e-05	0.00163636
ZNF550	-1.62172	3.12283e-08	0.000124836
ZNF551	-1.17927	0.000279224	0.00893518
ZNF555	-1.38432	2.57645e-05	0.00263803
ZNF558	-1.18021	2.70443e-05	0.00270696
ZNF563	-1.19521	5.94107e-05	0.0040218
ZNF564	-1.30563	4.07417e-05	0.00333139
ZNF57	-1.29717	0.000306631	0.00954626
ZNF571	-1.22554	0.000195592	0.00742964
ZNF572	-1.35765	0.000123174	0.0060272
ZNF573	-1.23745	0.0001131	0.00577999
ZNF594	-1.31513	0.000118395	0.00588603
ZNF599	-1.19928	5.43238e-05	0.00388928
ZNF606	-1.33669	3.99247e-06	0.00105131
ZNF616	-1.22302	3.72166e-05	0.00314329
ZNF641	-1.14707	0.000217976	0.00786293
ZNF667	-1.24746	0.000145193	0.00650061
ZNF691	-1.28437	9.07069e-05	0.00519478
ZNF79	-1.22061	0.000179401	0.00713744
ZNF823	-1.23195	0.000148274	0.0065536
ZNF91	-1.24467	6.63235e-05	0.00433967
ZRANB2	-1.23209	0.000168349	0.0069186
ZSCAN12	-1.15671	0.000190881	0.00736156
ZSCAN9	-1.21531	0.00010332	0.00553511
ZSWIM3	-1.28436	0.000184471	0.00724636
