# Supplementary material for: Molecular Landscape of Pelvic Organ Prolapse Provides Insights into Disease Etiology
Source: Int J Mol Sci. 2023 Mar 23;24(7):6087. doi: 10.3390/ijms24076087 (PMC10094264; doi:10.3390/ijms24076087)
Supplement: Supplementary file 1 [file ijms-24-06087-s001.zip › ijms-2158288-supplementary/Supplementary Table S3.xlsx]

## Sheet: Table S3
Gene	FC	P value	Corr P value
THC2296596	-2.85498	1.12348e-09	3.49088e-05		All genes with differential expression between POP and non-POP tissues of 12 premenopausal women with POP
COLEC12	-2.63479	2.13243e-08	0.000116348
A_32_P171043	-2.54706	2.24669e-08	0.000116348
BC069781	-1.92695	1.84099e-08	0.000116348
THC2340695	1.86438	1.59231e-08	0.000116348
WEE1	2.04087	1.58748e-08	0.000116348
GLI1	-1.80942	3.21412e-08	0.000124836
ZNF550	-1.62172	3.12283e-08	0.000124836
FLJ14397	-1.47672	1.0046e-07	0.000346833
CCBE1	-1.82608	1.16084e-07	0.000359944
LOC63920	-1.71911	1.27426e-07	0.000359944
THC2376725	-1.84347	1.57627e-07	0.000376753
BX352604	1.42091	1.45907e-07	0.000376753
H19	-3.92413	2.03897e-07	0.000411945
THC2308802	-1.70039	2.14743e-07	0.000411945
THC2378401	-1.66137	2.25382e-07	0.000411945
THC2374163	-1.5594	2.11791e-07	0.000411945
TIGD5	-1.374	2.57743e-07	0.000421504
THC2442727	1.99586	2.51819e-07	0.000421504
ZNF545	-1.34919	3.07139e-07	0.000477171
AK023574	-1.94738	4.87782e-07	0.000486934
THC2280343	-1.57886	4.13941e-07	0.000486934
AK056073	-1.53646	4.59513e-07	0.000486934
CHST12	-1.3024	5.23114e-07	0.000486934
FLJ20558	-1.21553	5.48491e-07	0.000486934
MEN1	-1.17278	4.64434e-07	0.000486934
OR7E156P	1.23951	4.12875e-07	0.000486934
C9orf21	1.51504	5.03373e-07	0.000486934
THC2395355	1.6344	3.94378e-07	0.000486934
ABL2	1.81637	4.38228e-07	0.000486934
ENST00000308482	1.89314	4.63629e-07	0.000486934
ARID5A	2.6689	4.89277e-07	0.000486934
A_23_P123234	2.84355	4.78108e-07	0.000486934
TNFRSF12A	3.10532	4.08185e-07	0.000486934
THC2314201	6.4396	5.37665e-07	0.000486934
FLJ40142	-1.69385	5.72894e-07	0.000494471
MGLL	1.33619	6.05936e-07	0.000508855
AF086011	-1.65448	6.74627e-07	0.000542367
BC021857	-1.53859	6.98206e-07	0.000542367
NFATC2	2.34527	6.94846e-07	0.000542367
U94902	2.27961	7.66237e-07	0.000580695
EMX2OS	-2.18583	8.14555e-07	0.000602615
THC2341051	-1.34231	9.04784e-07	0.000638942
ENST00000381802	2.32516	9.01355e-07	0.000638942
A_32_P148047	-1.59947	1.07191e-06	0.000645958
THC2443829	-1.38887	1.00993e-06	0.000645958
CSNK1A1	1.25774	1.03613e-06	0.000645958
SBDS	1.27351	9.38562e-07	0.000645958
ABCB4	1.28551	1.10182e-06	0.000645958
ZCSL2	1.48832	1.04485e-06	0.000645958
PDLIM1	1.49297	1.08268e-06	0.000645958
F2R	1.52276	1.0957e-06	0.000645958
BF475893	3.06966	1.09358e-06	0.000645958
THC2322881	-1.22352	1.12411e-06	0.000646822
RPUSD2	-1.36687	1.21973e-06	0.000664905
ENST00000370395	1.49569	1.21806e-06	0.000664905
JUND	1.6357	1.21313e-06	0.000664905
FLJ27365	-1.5071	1.25913e-06	0.000674545
PTMA	1.22584	1.29013e-06	0.000679441
LRRFIP1	1.25763	1.33133e-06	0.000689452
U92981	-2.1542	1.36331e-06	0.000691733
A_24_P152315	1.21936	1.38026e-06	0.000691733
FAM84B	-1.60027	1.44484e-06	0.000712605
THC2273031	-1.36262	1.54982e-06	0.000734086
PTPN11	1.2045	1.53847e-06	0.000734086
C14orf147	1.26995	1.55927e-06	0.000734086
MCTP1	1.57395	1.60231e-06	0.000743089
SURB7	1.19227	1.62724e-06	0.000743551
LOC92312	-1.74793	1.85584e-06	0.000812178
AK023572	1.84137	1.83628e-06	0.000812178
SERPINE1	2.08547	1.80676e-06	0.000812178
THC2393621	-1.61717	1.99638e-06	0.000831361
A_32_P2303	-1.48517	2.0009e-06	0.000831361
MCM3APAS	-1.37164	1.95269e-06	0.000831361
BICD1	1.23766	2.02399e-06	0.000831361
STK38L	1.48508	2.03345e-06	0.000831361
HOXA9	-1.53192	2.10118e-06	0.000840449
MLF1	1.77345	2.10978e-06	0.000840449
THC2408277	-1.88314	2.22958e-06	0.000859954
ZNF30	-1.45028	2.25986e-06	0.000859954
BC041996	-1.34005	2.26945e-06	0.000859954
GSPT2	-1.19978	2.2446e-06	0.000859954
THC2350463	-1.40192	2.36479e-06	0.000885287
AK021543	-1.64416	2.51359e-06	0.000900866
AK093987	-1.43609	2.55137e-06	0.000900866
THC2279918	-1.36071	2.53242e-06	0.000900866
AA292106	1.23127	2.47923e-06	0.000900866
RAB32	1.35911	2.54505e-06	0.000900866
HOXB5	-1.55833	2.60152e-06	0.000902248
PRMT6	-1.27959	2.61336e-06	0.000902248
FMO1	-2.15014	2.691e-06	0.000918844
GVIN1	-1.3311	2.83976e-06	0.000941843
COQ10B	1.32073	2.83368e-06	0.000941843
RND3	2.28848	2.84929e-06	0.000941843
SALL3	2.23208	2.95337e-06	0.00096597
SLC13A3	-1.33114	3.01961e-06	0.000977347
ENST00000328644	1.41046	3.11509e-06	0.000997855
THC2336861	-1.73878	3.16859e-06	0.00100464
DUSP8	1.59538	3.21513e-06	0.0010091
TGFB2	1.6843	3.27794e-06	0.00101852
BX538250	-1.33928	3.35331e-06	0.00103162
DSCR1	2.48565	3.42101e-06	0.00104213
A_32_P177300	-1.64095	3.69638e-06	0.00104534
PARS2	-1.47123	3.55545e-06	0.00104534
THC2439328	-1.4362	3.70066e-06	0.00104534
THC2283996	-1.40666	3.6444e-06	0.00104534
THC2406168	-1.27243	3.63366e-06	0.00104534
AK093429	1.18226	3.51164e-06	0.00104534
NEDD9	2.01426	3.64162e-06	0.00104534
U88892	2.20179	3.63194e-06	0.00104534
THC2439426	-2.03828	3.92712e-06	0.00105131
AW340352	-1.55828	3.94262e-06	0.00105131
FAM78A	-1.46048	3.89639e-06	0.00105131
ZNF606	-1.33669	3.99247e-06	0.00105131
SREBF1	-1.31228	3.99183e-06	0.00105131
HBLD1	-1.26032	3.84958e-06	0.00105131
THC2432742	-1.25081	3.80352e-06	0.00105131
SLITRK6	2.04315	3.78874e-06	0.00105131
SCCPDH	1.20926	4.11953e-06	0.00107478
A_24_P92823	1.48934	4.15078e-06	0.00107478
TRIB1	3.50866	4.24848e-06	0.00109098
M28219	1.40561	4.48438e-06	0.00114212
C14orf80	1.83088	4.52391e-06	0.00114282
AK090766	-1.41848	4.88383e-06	0.00117636
THC2363557	-1.31262	4.87671e-06	0.00117636
PPP1R3E	-1.2983	4.82123e-06	0.00117636
ZNF485	-1.2858	4.77524e-06	0.00117636
BU618641	1.42144	4.83888e-06	0.00117636
RP11-138L21.1	1.48999	4.82285e-06	0.00117636
AK021576	-1.42262	4.94702e-06	0.00118241
ACRC	-1.37221	4.98992e-06	0.00118356
ENST00000221282	-1.48259	5.12152e-06	0.00120557
THC2314177	-1.40975	5.35717e-06	0.00124088
TAGLN2	1.41031	5.33406e-06	0.00124088
THC2371907	1.4138	5.39133e-06	0.00124088
THC2347318	-1.50109	5.53708e-06	0.00124611
A_32_P121674	-1.45158	5.5654e-06	0.00124611
A_32_P36835	-1.35635	5.55724e-06	0.00124611
CENTB1	-1.24851	5.57446e-06	0.00124611
RAD54B	-1.26262	5.63919e-06	0.00125158
THC2266474	-1.34966	5.81322e-06	0.0012599
AF289567	-1.33432	5.79475e-06	0.0012599
KIAA1822L	2.0067	5.8794e-06	0.0012599
U94903	2.47095	5.87294e-06	0.0012599
A_24_P930049	2.83934	5.87117e-06	0.0012599
BC017507	-1.38321	5.9491e-06	0.0012661
THC2406579	-1.32876	6.01891e-06	0.00127104
AK096685	1.50367	6.05412e-06	0.00127104
A_32_P34064	-1.51618	6.12887e-06	0.0012781
AK092379	-1.53368	6.54353e-06	0.00129564
EMID1	-1.29596	6.62747e-06	0.00129564
NS3BP	-1.29506	6.62996e-06	0.00129564
GPR44	-1.20161	6.28264e-06	0.00129564
HABP4	1.2677	6.54267e-06	0.00129564
ENST00000344556	1.29146	6.38141e-06	0.00129564
MYO5A	1.30443	6.62611e-06	0.00129564
ENST00000371207	1.32445	6.52203e-06	0.00129564
TAF13	1.4626	6.45642e-06	0.00129564
A_32_P207986	1.55092	6.34565e-06	0.00129564
PCDHGC4	1.28669	6.73616e-06	0.00130816
CDON	-1.76902	6.91573e-06	0.00131832
PTN	-1.68689	6.87583e-06	0.00131832
HBEGF	1.94183	6.91437e-06	0.00131832
A_32_P200820	1.22121	6.97694e-06	0.00132187
A_23_P210285	1.27603	7.29297e-06	0.00135693
ENST00000276938	1.29756	7.2796e-06	0.00135693
LOC338620	1.55427	7.26144e-06	0.00135693
LOC132241	-1.51209	7.46075e-06	0.00137988
AK055372	-1.57538	7.6815e-06	0.00138691
ENST00000371079	-1.41528	7.6017e-06	0.00138691
PLEKHJ1	-1.24262	7.55535e-06	0.00138691
OR2B2	1.23578	7.72191e-06	0.00138691
FEM1C	1.31668	7.66966e-06	0.00138691
FADD	-1.25021	7.86684e-06	0.00140482
THC2263651	-1.31891	8.03813e-06	0.0014272
KIAA0701	1.22276	8.33378e-06	0.00147129
C16orf70	-1.15982	8.6557e-06	0.00151949
2'-PDE	1.2436	8.89039e-06	0.00155192
OGG1	-1.20063	8.99961e-06	0.00156221
NR4A3	4.46651	9.10252e-06	0.0015713
BC011455	-1.23157	9.15573e-06	0.00157175
ZNF167	-1.46472	9.28557e-06	0.00157662
ST6GALNAC5	1.55732	9.26766e-06	0.00157662
GLP2R	-1.97318	9.57335e-06	0.00159926
MSX2	1.50462	9.55997e-06	0.00159926
ODF3L1	1.66834	9.47865e-06	0.00159926
A_24_P67552	1.30134	9.7105e-06	0.0016135
LEFTY2	-1.67834	9.90604e-06	0.00162306
EPO	-1.67509	1.00292e-05	0.00162306
ZNF177	-1.41967	9.9369e-06	0.00162306
LOC90355	-1.38292	1.00286e-05	0.00162306
RBM4B	-1.22557	9.9125e-06	0.00162306
ZNF526	-1.34001	1.01641e-05	0.00163636
ETAA16	-1.3001	1.02517e-05	0.00164196
D4S234E	-1.72056	1.04618e-05	0.00165289
ZNF419	-1.21632	1.04988e-05	0.00165289
AARSL	-1.21277	1.05501e-05	0.00165289
LOC221710	1.23448	1.05859e-05	0.00165289
SDC2	1.45842	1.03813e-05	0.00165289
AK126245	-1.39666	1.07319e-05	0.00165418
AK026811	-1.38982	1.06794e-05	0.00165418
FLJ11903	1.61499	1.07539e-05	0.00165418
STK17A	1.36889	1.08577e-05	0.00166192
CDKN2A	1.44412	1.11166e-05	0.00169322
AK124352	-1.77409	1.14367e-05	0.00169432
AK095214	-1.43311	1.15601e-05	0.00169432
C7orf38	-1.31919	1.12616e-05	0.00169432
C10orf137	-1.25694	1.14817e-05	0.00169432
KIF5B	1.24718	1.11923e-05	0.00169432
A_24_P726495	1.26333	1.15399e-05	0.00169432
YPEL2	1.2984	1.15339e-05	0.00169432
DLC1	1.65305	1.1488e-05	0.00169432
THC2316976	-1.37897	1.18695e-05	0.0017315
LOC554208	-1.41664	1.19614e-05	0.00173676
AK023526	-1.54845	1.2791e-05	0.00184857
X51602	-1.38063	1.32229e-05	0.0019012
VPS37B	1.30387	1.32776e-05	0.0019012
RMI1	-1.41182	1.34773e-05	0.00191731
ANKAR	-1.34017	1.35135e-05	0.00191731
KBTBD7	-1.39948	1.36301e-05	0.00192507
BC037893	-1.29011	1.39534e-05	0.00196181
RHOB	1.55786	1.41591e-05	0.00198176
SNAI1	2.3892	1.44228e-05	0.00200962
THC2406026	-1.25753	1.47884e-05	0.00205136
ANK3	1.62182	1.48857e-05	0.00205569
THC2368568	-1.31102	1.50226e-05	0.0020654
M96686	2.02412	1.51078e-05	0.00206798
ZNF133	-1.25551	1.53663e-05	0.00208146
C1orf108	1.30577	1.53123e-05	0.00208146
CSDA	1.44514	1.54073e-05	0.00208146
SIRT4	-1.33834	1.55114e-05	0.00208645
LOC286025	-1.29227	1.57372e-05	0.00209865
ZNF202	-1.28358	1.5718e-05	0.00209865
ZNF276	-1.20089	1.58361e-05	0.00210281
AK022016	1.35024	1.59166e-05	0.00210452
PEX12	-1.40898	1.61267e-05	0.0021143
FAM83D	4.14636	1.61031e-05	0.0021143
IGF2	-1.85964	1.63202e-05	0.00213068
A_32_P106466	1.45687	1.6749e-05	0.00217117
LMNA	1.5286	1.67701e-05	0.00217117
AI219192	1.51558	1.69008e-05	0.00217901
GPR155	1.39203	1.72608e-05	0.00221623
THC2378635	-1.45686	1.76916e-05	0.0022548
DOC1	1.7677	1.77063e-05	0.0022548
MME	2.35911	1.8286e-05	0.00231912
AK125170	-1.29052	1.85987e-05	0.00234751
DCUN1D2	-1.19945	1.8661e-05	0.00234751
RND2	1.41899	1.91002e-05	0.00239308
AW444553	-1.70834	1.98924e-05	0.00245276
LOC389072	-1.26448	1.98516e-05	0.00245276
ZNF132	-1.25375	1.9679e-05	0.00245276
THC2315555	2.33363	1.97493e-05	0.00245276
KLHL13	-1.60336	2.05965e-05	0.00247079
BI771054	-1.58426	2.13665e-05	0.00247079
THC2441641	-1.32625	2.10767e-05	0.00247079
AK000144	-1.32094	2.07743e-05	0.00247079
C3orf54	-1.31259	2.13178e-05	0.00247079
THC2433060	-1.30572	2.11214e-05	0.00247079
AF086442	-1.26952	2.11973e-05	0.00247079
AX775927	-1.26655	2.09785e-05	0.00247079
AL833832	-1.26025	2.11745e-05	0.00247079
OR7E24	1.20702	2.13283e-05	0.00247079
C6orf145	1.32677	2.12385e-05	0.00247079
RNF12	1.33011	2.0568e-05	0.00247079
CEBPG	1.36005	2.09498e-05	0.00247079
JDP2	1.44229	2.04515e-05	0.00247079
ENST00000284767	2.31365	2.13904e-05	0.00247079
SIX1	2.75929	2.10344e-05	0.00247079
AXUD1	3.84745	2.10108e-05	0.00247079
ZADH2	-1.29904	2.17421e-05	0.00250211
FLJ21369	-1.27482	2.22007e-05	0.00254547
AK024516	-1.29358	2.23308e-05	0.00255097
BI836739	-1.66201	2.25398e-05	0.00256541
FLRT2	-1.31725	2.2715e-05	0.00256808
C7orf23	-1.26394	2.27529e-05	0.00256808
BCL7B	1.16339	2.28112e-05	0.00256808
THC2350023	-1.29079	2.30924e-05	0.00257179
ZBTB33	-1.18485	2.30546e-05	0.00257179
DDX25	1.22984	2.29368e-05	0.00257179
GPRC6A	1.211	2.32464e-05	0.00257968
AK021798	-1.42711	2.35365e-05	0.00258607
THC2439128	1.28573	2.37201e-05	0.00258607
THC2342574	1.45216	2.37105e-05	0.00258607
ANKRD37	1.9684	2.34657e-05	0.00258607
PLK3	2.23668	2.36207e-05	0.00258607
C11orf21	-1.36669	2.40151e-05	0.00259097
STX1A	-1.30225	2.3955e-05	0.00259097
THC2375635	-1.25435	2.39094e-05	0.00259097
BMSC-MCP	1.3736	2.4166e-05	0.00259822
NBLA00301	-1.79313	2.43274e-05	0.00260656
EFNB1	-1.37141	2.47855e-05	0.00261951
LOC387787	-1.33779	2.46529e-05	0.00261951
A_24_P368748	1.24299	2.47508e-05	0.00261951
MAFK	1.46502	2.45892e-05	0.00261951
LOC645277	-1.71056	2.49611e-05	0.00262042
THC2453304	-1.40491	2.49628e-05	0.00262042
MBTD1	-1.45046	2.57155e-05	0.00263803
ZNF555	-1.38432	2.57645e-05	0.00263803
A_32_P211048	-1.32545	2.52757e-05	0.00263803
OXSM	-1.2752	2.57913e-05	0.00263803
THC2407694	-1.16667	2.58098e-05	0.00263803
RAB21	1.23411	2.57832e-05	0.00263803
CCND2	1.29293	2.56572e-05	0.00263803
ENST00000379969	1.44589	2.55337e-05	0.00263803
ZNF416	-1.29503	2.62246e-05	0.00267164
SWAP70	1.24822	2.63586e-05	0.00267652
AF242771	1.13946	2.67275e-05	0.00270513
GRID1	-1.4203	2.70939e-05	0.00270696
KBTBD6	-1.35346	2.70233e-05	0.00270696
THC2371284	-1.31963	2.70842e-05	0.00270696
ZNF558	-1.18021	2.70443e-05	0.00270696
THC2378276	1.30166	2.7196e-05	0.00270845
AK093713	1.28041	2.74689e-05	0.00272688
THC2315602	-1.37694	2.76007e-05	0.00273124
A_32_P99399	1.30627	2.77877e-05	0.00274101
AW946823	-1.53486	2.8505e-05	0.00279403
BC044608	-1.24913	2.84477e-05	0.00279403
THC2334551	-1.41166	2.87874e-05	0.0028073
AK090416	-1.32316	2.88211e-05	0.0028073
AK023892	1.54851	2.90763e-05	0.00282331
AMOTL1	1.33325	2.91693e-05	0.00282351
THC2350817	-1.47324	2.96269e-05	0.0028589
BQ926066	-1.23328	2.98115e-05	0.00286119
LPHN2	1.30559	2.98348e-05	0.00286119
AK090480	-1.60508	3.05739e-05	0.00289745
P2RY5	-1.45768	3.07723e-05	0.00289745
MGC10701	-1.36684	3.03832e-05	0.00289745
BF446608	-1.32885	3.06919e-05	0.00289745
THC2283783	-1.26983	3.07197e-05	0.00289745
AREG	3.18841	3.05968e-05	0.00289745
A_32_P107797	1.24981	3.11296e-05	0.00292223
AP4B1	-1.16715	3.14916e-05	0.00294731
ZNF184	-1.27336	3.16268e-05	0.00295107
AK001120	-1.30566	3.17334e-05	0.00295216
MDK	-1.78604	3.19407e-05	0.00295872
DNAJB4	1.41966	3.19944e-05	0.00295872
NEURL	-1.90085	3.28978e-05	0.00298018
THC2283319	-1.67065	3.26539e-05	0.00298018
WIT1	-1.57584	3.28299e-05	0.00298018
SLC16A9	-1.33639	3.2422e-05	0.00298018
FLJ21945	-1.29666	3.28965e-05	0.00298018
CHST6	1.48795	3.28811e-05	0.00298018
BC024745	2.05416	3.28955e-05	0.00298018
THC2370211	-1.23451	3.31873e-05	0.00299766
A_23_P208579	-1.62918	3.34839e-05	0.00301568
AK127572	-1.92771	3.36854e-05	0.00302172
HAO1	1.20603	3.37453e-05	0.00302172
HECW1	1.15714	3.38581e-05	0.0030231
PCDH18	-1.46112	3.44023e-05	0.00304253
THC2279910	-1.42874	3.51495e-05	0.00304253
THC2447689	-1.4271	3.50677e-05	0.00304253
THC2295157	-1.39675	3.42675e-05	0.00304253
MCMDC1	-1.34538	3.4767e-05	0.00304253
ENST00000371497	-1.25882	3.50128e-05	0.00304253
CDC73	1.12551	3.45622e-05	0.00304253
GAS2L1	1.17878	3.51528e-05	0.00304253
THC2434618	1.19381	3.43316e-05	0.00304253
TA-NFKBH	1.54383	3.50085e-05	0.00304253
MGC14376	1.83941	3.51523e-05	0.00304253
MGC16385	-1.26271	3.53446e-05	0.00305064
THC2315129	-1.40366	3.56465e-05	0.00305922
SPIN3	-1.2454	3.58047e-05	0.00305922
TWISTNB	1.20823	3.58379e-05	0.00305922
TNFRSF10D	1.39947	3.58142e-05	0.00305922
SLC19A2	1.66602	3.64164e-05	0.00310009
AK024147	-1.28518	3.65867e-05	0.00310607
ZNF616	-1.22302	3.72166e-05	0.00314329
CYFIP2	1.59439	3.72274e-05	0.00314329
AK095831	-1.39237	3.78727e-05	0.00318065
ZNF214	-1.29975	3.78746e-05	0.00318065
A_24_P533142	1.23492	3.80725e-05	0.00318865
DUSP10	1.79511	3.83351e-05	0.00320201
SCD5	1.1792	3.86602e-05	0.00322051
SNED1	-1.27832	3.88448e-05	0.00322724
TRIM32	-1.2333	3.91245e-05	0.0032418
DMTF1	-1.27157	3.96226e-05	0.00327434
THC2303268	-1.51884	3.98416e-05	0.00328371
CR610181	-1.733	4.00471e-05	0.00329192
BAG3	1.50289	4.03565e-05	0.0033086
ZNF564	-1.30563	4.07417e-05	0.00333139
AK023774	-1.58897	4.09457e-05	0.00333357
PARP16	-1.21742	4.0983e-05	0.00333357
C9orf30	1.24306	4.10968e-05	0.0033341
A4GALT	1.30807	4.12134e-05	0.00333485
BC047753	-1.40448	4.13943e-05	0.00334079
NAALAD2	-1.20975	4.15995e-05	0.00334865
PWWP2	-1.23479	4.18548e-05	0.00335641
C1orf176	-1.17459	4.19119e-05	0.00335641
TSC22D4	-1.16112	4.24784e-05	0.00338433
RDH10	1.45368	4.24445e-05	0.00338433
AK024956	-1.56987	4.32429e-05	0.0034252
THC2282717	1.2896	4.33221e-05	0.0034252
ACTA1	3.43758	4.31652e-05	0.0034252
NAT2	-1.22032	4.35964e-05	0.00343778
C14orf24	1.30169	4.37025e-05	0.00343778
RP5-1022P6.2	1.22236	4.382e-05	0.00343832
ZNF234	-1.28045	4.41136e-05	0.00345264
ELOVL3	1.24803	4.4352e-05	0.00346258
ZC3H12A	2.09155	4.46224e-05	0.00347495
AK098491	-1.37283	4.49058e-05	0.00348828
LARP2	1.1371	4.50982e-05	0.00349449
KIAA0907	-1.34389	4.54426e-05	0.00351242
THC2283605	1.37957	4.61301e-05	0.00355671
CR749685	-1.23118	4.65251e-05	0.00357829
THC2338716	-1.19557	4.77315e-05	0.00366201
CPNE5	-1.63089	4.81137e-05	0.00367319
FAM80B	1.37587	4.80737e-05	0.00367319
FANCF	-1.43645	4.83e-05	0.00367589
KLHL4	-1.27621	4.83857e-05	0.00367589
ZNF14	-1.29772	4.89035e-05	0.00368864
AHI1	1.15656	4.89096e-05	0.00368864
RNF122	2.7126	4.87701e-05	0.00368864
MAML2	1.32379	4.91757e-05	0.00369973
ENST00000377209	1.3263	4.94877e-05	0.0037142
THC2280176	-1.22631	5.04559e-05	0.00377156
BP290435	1.26638	5.0616e-05	0.00377156
APOLD1	2.95723	5.0516e-05	0.00377156
W60781	-1.8604	5.09357e-05	0.0037863
AADAT	-1.24674	5.13893e-05	0.00380183
SEDLP	1.21025	5.12888e-05	0.00380183
THC2435791	-1.5088	5.3042e-05	0.00383284
HS3ST1	-1.48894	5.26994e-05	0.00383284
BC041417	-1.31053	5.23633e-05	0.00383284
L1CAM	1.2565	5.27838e-05	0.00383284
DDX3X	1.28337	5.27175e-05	0.00383284
BC041913	1.31723	5.30024e-05	0.00383284
IFRD1	1.46337	5.19584e-05	0.00383284
BDKRB2	1.89946	5.22678e-05	0.00383284
THBD	2.10925	5.29898e-05	0.00383284
SERTAD1	2.37399	5.23676e-05	0.00383284
MSI1	1.17731	5.33949e-05	0.00384939
CA414006	-1.34902	5.37289e-05	0.00385855
UFM1	1.21716	5.37704e-05	0.00385855
ZNF599	-1.19928	5.43238e-05	0.00388928
MSX2P	1.60138	5.48154e-05	0.00391546
LOC338799	-1.78976	5.54758e-05	0.00393383
THC2274697	-1.46446	5.55791e-05	0.00393383
PRPS2	-1.34302	5.53838e-05	0.00393383
C1orf183	1.21592	5.53766e-05	0.00393383
FRMD5	1.27399	5.59849e-05	0.00395356
A_23_P50195	-1.25807	5.6481e-05	0.00397954
ABCG2	-1.34887	5.67089e-05	0.00398656
KIAA1666	-1.43721	5.8005e-05	0.00399024
FLJ40473	-1.3414	5.77158e-05	0.00399024
ZNF500	-1.33627	5.75462e-05	0.00399024
THC2264612	-1.23893	5.79905e-05	0.00399024
COX19	-1.2305	5.73491e-05	0.00399024
RBM5	-1.19093	5.78383e-05	0.00399024
ARMC7	-1.18554	5.80525e-05	0.00399024
YOD1	-1.15338	5.84308e-05	0.00399024
KCNK2	1.20396	5.81279e-05	0.00399024
MYEF2	1.26319	5.8216e-05	0.00399024
KIAA0040	1.37871	5.7195e-05	0.00399024
TUBAL3	2.26656	5.83156e-05	0.00399024
SLC2A14	2.68679	5.82945e-05	0.00399024
A_24_P530690	1.29375	5.89014e-05	0.00401357
ZNF563	-1.19521	5.94107e-05	0.0040218
OR7E47P	1.34053	5.93089e-05	0.0040218
MLC1	1.75659	5.92448e-05	0.0040218
THC2409283	1.33484	5.96622e-05	0.00403005
EPHB3	-1.50761	6.03413e-05	0.00404951
THC2341617	-1.25173	6.00949e-05	0.00404951
THC2266020	-1.16981	6.03096e-05	0.00404951
ABHD10	-1.18495	6.06812e-05	0.00406355
EMX2	-1.91624	6.1503e-05	0.00408327
A_32_P30014	-1.42365	6.14066e-05	0.00408327
AK025221	-1.37187	6.15096e-05	0.00408327
ISLR	-1.29873	6.16328e-05	0.00408327
PPP1R15B	1.48439	6.15638e-05	0.00408327
HUS1B	1.23194	6.3373e-05	0.00418963
ZNF212	-1.21302	6.47895e-05	0.00427418
SVEP1	-1.5667	6.68251e-05	0.00433967
ENST00000341533	-1.36949	6.67479e-05	0.00433967
BC032042	-1.29292	6.68452e-05	0.00433967
ZNF91	-1.24467	6.63235e-05	0.00433967
TRIM52	-1.21138	6.70392e-05	0.00433967
ZBTB9	-1.18462	6.64415e-05	0.00433967
RIPK2	1.21867	6.60019e-05	0.00433967
LOC161635	1.31698	6.6903e-05	0.00433967
FOSL2	1.6651	6.69229e-05	0.00433967
AK027393	-1.23132	6.72712e-05	0.00434083
ZNF189	-1.12242	6.73365e-05	0.00434083
A_32_P53976	-1.33561	6.81315e-05	0.00435593
AF085902	1.2494	6.79052e-05	0.00435593
SH3BP4	1.31106	6.80408e-05	0.00435593
THC2314346	1.42836	6.78656e-05	0.00435593
AK021848	-1.41026	6.86524e-05	0.00437125
PIGA	1.32773	6.86383e-05	0.00437125
FMO2	-1.68446	6.92758e-05	0.0044003
U66046	-1.32735	6.93919e-05	0.0044003
CR608275	-1.28188	6.95853e-05	0.00440358
AK021906	-1.2547	7.01347e-05	0.00441139
SHRM	1.94064	7.00287e-05	0.00441139
SLN	2.61255	6.99405e-05	0.00441139
BC030118	-1.34049	7.04822e-05	0.00441177
AK130431	-1.2612	7.05668e-05	0.00441177
ZNF398	-1.18806	7.03804e-05	0.00441177
TUB	-1.24291	7.07455e-05	0.00441406
NHEJ1	-1.15995	7.16359e-05	0.00446067
LOC91461	-1.29892	7.21415e-05	0.00447421
CD58	1.24217	7.21367e-05	0.00447421
THC2317093	-1.46541	7.29264e-05	0.00450491
USP12	1.25176	7.29258e-05	0.00450491
FAM107B	1.49053	7.3383e-05	0.00452412
ENST00000304105	1.1818	7.40988e-05	0.0045592
THC2384975	-1.34089	7.4472e-05	0.00457311
A_32_P58912	-1.49068	7.478e-05	0.00457395
ZBTB3	-1.28779	7.47233e-05	0.00457395
FLJ22662	-1.26871	7.65774e-05	0.00466567
ASB7	-1.20419	7.65799e-05	0.00466567
EARS2	-1.31612	7.7274e-05	0.00468956
PPAT	-1.16022	7.72635e-05	0.00468956
FLJ32130	-1.32251	7.77818e-05	0.00471118
SMPD3	-1.28081	7.81773e-05	0.00472592
KLRG1	-1.3433	7.86071e-05	0.00474268
LOC400960	-1.21356	7.97254e-05	0.00480083
GPR22	-1.53373	8.04623e-05	0.00480793
ATF7IP2	-1.20823	8.00616e-05	0.00480793
THC2406792	1.28473	8.0449e-05	0.00480793
ID3	1.35329	8.04198e-05	0.00480793
LOC90835	-1.18111	8.14139e-05	0.00485545
ENST00000330330	-1.25768	8.21585e-05	0.00489047
TMEM42	-1.25344	8.28825e-05	0.00492414
NANOG	-1.44032	8.33694e-05	0.00494361
TXNIP	-1.3842	8.37376e-05	0.00495347
KIAA1383	-1.20166	8.38545e-05	0.00495347
FZD4	-1.24744	8.40961e-05	0.00495832
SLC2A1	-1.71277	8.44663e-05	0.00497072
THC2319766	-1.27805	8.48477e-05	0.00497814
FOXA2	1.22002	8.49129e-05	0.00497814
CLK4	-1.31646	8.55078e-05	0.00500358
TPM4	1.34298	8.60429e-05	0.00502542
TCP11L2	1.41746	8.65991e-05	0.00504842
LOC645032	-1.39792	8.69514e-05	0.00505946
DIRC2	1.17902	8.71443e-05	0.00506121
AV753543	-1.36625	8.74802e-05	0.00507124
SPAG9	1.1349	8.84412e-05	0.0051174
THC2373845	-1.27461	8.8837e-05	0.00512447
ICAM1	2.61221	8.88932e-05	0.00512447
COMP	3.5265	8.97754e-05	0.00516574
ZNF691	-1.28437	9.07069e-05	0.00519478
BM475547	-1.24556	9.07815e-05	0.00519478
ZNF454	-1.21587	9.06569e-05	0.00519478
THC2440580	-1.23182	9.09861e-05	0.00519691
FIGNL1	-1.2322	9.27099e-05	0.00528566
THC2386413	-1.26064	9.41318e-05	0.00528908
THC2378994	-1.20788	9.36062e-05	0.00528908
PJA1	-1.19683	9.40912e-05	0.00528908
THC2311218	1.2209	9.36791e-05	0.00528908
C9orf150	1.26612	9.31838e-05	0.00528908
WWTR1	1.36187	9.34431e-05	0.00528908
CCDC19	1.37022	9.39725e-05	0.00528908
ENST00000229270	1.40582	9.40419e-05	0.00528908
C1orf63	-1.24114	9.44884e-05	0.00529954
PAFAH1B3	-1.2673	9.50385e-05	0.00531122
THC2284174	-1.21897	9.49832e-05	0.00531122
AK127194	-1.96758	9.56941e-05	0.00533825
LOC439949	-1.38047	9.64163e-05	0.0053689
FLJ13646	-1.28952	9.70699e-05	0.00538599
ZNF439	-1.2691	9.69597e-05	0.00538599
PLEKHF1	-1.22271	9.7478e-05	0.00539899
TTMB	-1.26454	9.86618e-05	0.00541629
SF3B3	-1.14451	9.85864e-05	0.00541629
THC2438642	1.18707	9.86083e-05	0.00541629
AI669333	1.34325	9.82834e-05	0.00541629
ARID5B	1.36368	9.8247e-05	0.00541629
C17orf59	-1.20358	9.90374e-05	0.00541776
AI915259	1.23529	9.89116e-05	0.00541776
CR590180	-1.2399	9.94439e-05	0.00543044
SYNPO2	1.64614	9.967e-05	0.00543324
C20orf94	1.31793	9.99068e-05	0.00543661
AK130741	-1.29759	0.00010051	0.00545033
NANOS3	1.27429	0.000100384	0.00545033
AI301106	-1.24308	0.000102156	0.00552396
ALDH9A1	-1.18804	0.000102223	0.00552396
CMKOR1	1.69081	0.000102425	0.00552526
THC2263973	-1.55767	0.000102657	0.00552816
A_32_P79515	-1.30456	0.000103067	0.00553511
ZNF193	-1.21531	0.00010332	0.00553511
BC038432	1.26501	0.000103191	0.00553511
FLJ42953	1.1794	0.000103592	0.00553669
CDKN2B	1.33574	0.000103706	0.00553669
L3MBTL	-1.23054	0.000104318	0.0055598
C1orf55	1.27019	0.00010484	0.00557805
BX105152	-1.47566	0.00010594	0.0056244
THC2415708	-1.24505	0.000106123	0.0056244
EED	-1.20756	0.000106353	0.0056244
THC2441058	1.8335	0.000106435	0.0056244
SPATA5L1	-1.19201	0.000106865	0.00563753
A_32_P176200	1.47072	0.000107146	0.00564278
ENST00000322032	-3.53722	0.000109458	0.00571754
THC2375588	-1.36322	0.000110406	0.00571754
FRAT2	-1.31239	0.000110204	0.00571754
AK021595	-1.29127	0.000109451	0.00571754
FAM102A	-1.26462	0.000109247	0.00571754
BG114486	-1.25251	0.000110169	0.00571754
BC069659	-1.22576	0.000110256	0.00571754
NSUN5	-1.19134	0.0001102	0.00571754
TIGD6	-1.18447	0.000109082	0.00571754
LOC399851	1.21082	0.000109614	0.00571754
A_24_P922893	-1.27892	0.000111073	0.00572516
AK098478	1.37576	0.00011095	0.00572516
ID4	1.45233	0.000111106	0.00572516
THC2280638	-1.4097	0.000111365	0.00572902
A_32_P89277	-1.2458	0.000112301	0.00575909
A_24_P934861	-1.18679	0.00011232	0.00575909
AK022407	-1.29758	0.000112517	0.00575969
ZNF573	-1.23745	0.0001131	0.00577999
PLK1	-1.20474	0.000113731	0.00580269
C17orf42	-1.17871	0.000114115	0.00581274
A_23_P39746	-1.43347	0.000114348	0.0058151
AK057196	-1.50497	0.000114954	0.00583638
CN430296	-1.2938	0.000116246	0.00586361
ITFG2	-1.1942	0.000116163	0.00586361
DCLRE1C	-1.18141	0.000115988	0.00586361
LRP1B	1.5511	0.000116136	0.00586361
AW204925	1.24501	0.000116438	0.00586379
TNNT3	-1.4298	0.000117527	0.00587493
CB250445	-1.37674	0.00011754	0.00587493
THC2400714	-1.21475	0.000117794	0.00587493
BC012036	-1.15134	0.000117608	0.00587493
USP13	1.24241	0.000117715	0.00587493
THC2381061	1.88996	0.000117303	0.00587493
ZNF594	-1.31513	0.000118395	0.00588603
ZNF449	-1.22113	0.000118234	0.00588603
A_32_P179807	-1.26846	0.000118662	0.00588989
PLXNA2	1.31407	0.000118889	0.00589175
TRAF3IP3	-1.42632	0.000119861	0.00593047
LOC645427	-1.26838	0.000120505	0.00595281
ZBTB8	-1.15812	0.000120732	0.00595456
SOX4	-1.32786	0.000121685	0.00596722
DA438590	1.23412	0.000121756	0.00596722
A_24_P110601	1.38423	0.000121424	0.00596722
RALGDS	1.63131	0.000121512	0.00596722
ZNF572	-1.35765	0.000123174	0.0060272
BE839843	1.53404	0.000123566	0.00602737
CREB5	1.59001	0.000123465	0.00602737
CA843452	1.20013	0.000123937	0.00603598
BX490547	-1.26845	0.000124375	0.00604527
CR603450	-1.25335	0.000124677	0.00604527
BE165955	-1.17666	0.000124711	0.00604527
RBP5	-1.3593	0.000126676	0.00611194
ZNF490	-1.24076	0.000126526	0.00611194
IL6	6.54847	0.000126657	0.00611194
MGC16121	-2.19795	0.000129785	0.00612868
AI207522	-1.61198	0.000128481	0.00612868
AF143879	-1.47176	0.000128668	0.00612868
AK022479	-1.34553	0.000129383	0.00612868
THC2365025	-1.33431	0.000128528	0.00612868
ARL4A	-1.32813	0.000129618	0.00612868
ENST00000263511	-1.2903	0.00012736	0.00612868
CCDC8	-1.26146	0.000129236	0.00612868
BC000845	1.24694	0.000128125	0.00612868
THC2400529	1.381	0.000128841	0.00612868
BMP8B	1.4753	0.000127911	0.00612868
KRTAP6-3	1.58043	0.000128672	0.00612868
AK130878	1.59762	0.0001294	0.00612868
ENST00000339446	2.36731	0.000129428	0.00612868
ENST00000326881	-1.19942	0.000130239	0.00613401
A_23_P202034	1.12092	0.000130292	0.00613401
FZD10	1.71504	0.000130509	0.00613489
EPS8L1	-1.36983	0.00013154	0.00616535
AK092134	1.2132	0.000131553	0.00616535
ZFP62	-1.2893	0.000132199	0.00617699
ENTPD1	1.3078	0.000132076	0.00617699
ZNF18	-1.17584	0.000133058	0.00620776
ENST00000355247	-1.2576	0.00013473	0.00624826
TTC9C	-1.22264	0.000134623	0.00624826
AF119871	-1.20409	0.000134277	0.00624826
BE540788	1.25031	0.000134525	0.00624826
CASKIN2	1.27733	0.000135488	0.00627405
FAM107A	1.57834	0.000135822	0.00628014
JMJD1C	1.27122	0.000136429	0.00629075
CORIN	1.60691	0.000136456	0.00629075
AA642112	-1.26029	0.000138207	0.00635262
C1orf71	1.35355	0.000138094	0.00635262
MGC23270	-1.11937	0.000139004	0.00637983
A_23_P2032	-1.3793	0.000139223	0.00638043
DRCTNNB1A	1.12717	0.000139695	0.00639264
THC2274685	-1.33175	0.000141074	0.00644624
A_24_P915326	-1.33377	0.000142454	0.00644983
ARHGAP18	-1.33248	0.000142011	0.00644983
ZNF284	-1.24583	0.000142605	0.00644983
RCBTB2	-1.18702	0.000142489	0.00644983
DCAKD	-1.16991	0.000142191	0.00644983
ITGA7	1.5028	0.000142353	0.00644983
BF514513	1.51089	0.000141811	0.00644983
SRGAP1	-1.2189	0.000143575	0.00647482
A_24_P247205	1.3957	0.000143505	0.00647482
ENST00000328681	-1.35313	0.000144272	0.00648999
LOC400684	-1.2451	0.000144538	0.00648999
PEX11B	-1.24013	0.000144479	0.00648999
XRCC4	1.14052	0.00014488	0.00649596
ZNF667	-1.24746	0.000145193	0.00650061
AF086536	-1.25822	0.000145969	0.00651658
NAPG	1.17743	0.000145825	0.00651658
AK022183	-1.31111	0.000146672	0.00653522
AK025323	-1.19134	0.000146807	0.00653522
THC2458496	-1.41043	0.000147355	0.00654155
ENST00000368847	-1.25627	0.000147581	0.00654155
CPXM2	1.4573	0.000147551	0.00654155
ENST00000341191	-1.23195	0.000148274	0.0065536
MAGEA6	1.36945	0.000148094	0.0065536
AL831885	-1.32009	0.000149229	0.00655849
PRICKLE2	-1.25581	0.000149113	0.00655849
THC2282416	-1.24	0.000148998	0.00655849
PEA15	1.18018	0.000149174	0.00655849
THC2313538	-1.29066	0.000149624	0.00656656
KIAA1018	-1.22029	0.000150206	0.00658278
ENST00000357283	-1.22088	0.000150899	0.00660385
SERPINB8	1.44477	0.000151409	0.00661684
LOC150759	-1.22393	0.000151964	0.00663178
AK027294	-1.49535	0.000152422	0.00663364
RTP4	-1.29574	0.000152434	0.00663364
THC2300570	-1.15998	0.000152865	0.0066431
C8orf44	-1.24359	0.000153523	0.0066624
THC2284058	-2.02914	0.000154303	0.00668691
CECR6	-1.30354	0.000155328	0.00669011
THC2406532	-1.28801	0.000154982	0.00669011
MGC35295	1.20567	0.000155058	0.00669011
FSTL3	1.36519	0.000155204	0.00669011
A_32_P599	1.44139	0.000155454	0.00669011
GOLPH3L	-1.11994	0.000156793	0.0067384
LMO3	-1.57732	0.000157404	0.00674283
ANKFY1	-1.22473	0.000157715	0.00674283
XKR8	-1.22434	0.000157981	0.00674283
USP49	-1.14779	0.000157313	0.00674283
SKIL	1.43278	0.00015779	0.00674283
TRO	-1.32312	0.000159112	0.00674479
AK021463	-1.22912	0.000158953	0.00674479
RFP2	-1.14762	0.00015825	0.00674479
N90434	1.30067	0.000158721	0.00674479
ITGB3	1.51356	0.000158721	0.00674479
SLK	1.14841	0.000160535	0.00679082
KLK15	1.24743	0.000160635	0.00679082
FAM19A5	-1.51831	0.000161616	0.00680145
WDR5B	-1.28129	0.000161242	0.00680145
THC2378571	-1.23489	0.000161981	0.00680145
TBC1D9B	-1.11008	0.000161661	0.00680145
ITGA1	1.4572	0.000161953	0.00680145
C1orf186	-1.72593	0.000162633	0.00681962
THC2441761	-1.45345	0.000163301	0.00683518
A_23_P57836	2.16447	0.000163444	0.00683518
CHMP1B	1.23609	0.000163681	0.00683587
MGC10993	-1.45705	0.000164675	0.00685897
THC2341892	-1.21511	0.000164599	0.00685897
LOC440839	-1.20151	0.000165497	0.00687475
ALCAM	1.42785	0.000165343	0.00687475
A_32_P176790	-1.28531	0.000168556	0.0069186
PTHR1	-1.2523	0.000168007	0.0069186
ZRANB2	-1.23209	0.000168349	0.0069186
LOC643641	-1.17747	0.000168331	0.0069186
BF689038	1.21587	0.000168379	0.0069186
PRKAG2	1.29197	0.000166874	0.0069186
DUSP14	1.57679	0.000168174	0.0069186
KLF10	1.59273	0.000167037	0.0069186
CSPG2	1.71726	0.000168504	0.0069186
ATF3	5.04509	0.000169246	0.00693776
DCP2	-1.18679	0.000170586	0.00697822
HSPC159	1.38812	0.000170683	0.00697822
THC2404993	-1.51118	0.000171751	0.00697932
IDH1	-1.27943	0.000171297	0.00697932
ARMCX2	-1.25281	0.000171257	0.00697932
BC021677	-1.24763	0.000171538	0.00697932
CDV3	1.20248	0.000171833	0.00697932
BTN3A1	-1.1986	0.000172304	0.00698023
ADAMTS1	2.20548	0.000172249	0.00698023
GIMAP8	-1.40242	0.000172914	0.00699277
ZNF307	-1.20499	0.000173064	0.00699277
FUT1	1.31173	0.00017349	0.00700088
FLJ39653	-1.27276	0.000174066	0.00700594
AKR1C1	1.55274	0.000173947	0.00700594
PYY2	1.4304	0.000174572	0.00701721
NSUN5C	-1.24527	0.000175152	0.00703144
FLJ30277	-1.21997	0.000175686	0.00704375
SILV	-2.91067	0.000177043	0.0070799
PRPF39	-1.22541	0.000176832	0.0070799
ANKRD49	-1.19269	0.000177338	0.00708257
TGFBR1	1.41353	0.000178633	0.00712514
TGDS	-1.26275	0.000179088	0.00713414
ZNF79	-1.22061	0.000179401	0.00713744
HAGH	1.19719	0.000179784	0.00714353
BX104982	1.27508	0.000180318	0.0071556
SPATA13	1.32512	0.000181806	0.00720544
SEMA5B	1.40467	0.000182326	0.00721686
CUZD1	-1.2726	0.000183443	0.00723341
THC2431711	1.17361	0.000183052	0.00723341
ARHGAP10	1.35843	0.000183356	0.00723341
ATP2A3	1.35149	0.000183744	0.0072361
THC2317006	-1.34505	0.000184026	0.00723806
ZSWIM3	-1.28436	0.000184471	0.00724636
LOC90693	1.13094	0.000184954	0.00725618
FLJ20160	1.28808	0.000185447	0.00725717
CSF3	4.05137	0.000185352	0.00725717
WDR75	-1.14305	0.000186319	0.00728215
ALKBH4	-1.21677	0.000186866	0.00728519
RFP	-1.15942	0.000186823	0.00728519
KLHL9	-1.20994	0.000187783	0.00731176
ZNF514	-1.25691	0.000188183	0.00731518
GM632	-1.16735	0.000188341	0.00731518
A_23_P320728	-1.28226	0.00018943	0.00734829
THC2378508	-1.31612	0.000189964	0.00735064
AK054562	-1.14497	0.000189738	0.00735064
AK056630	-1.17248	0.000190957	0.00736156
ZNF96	-1.15671	0.000190881	0.00736156
ISG20L1	1.26466	0.000190636	0.00736156
C14orf62	-1.25473	0.000191427	0.00737051
PVR	1.24238	0.000191853	0.00737778
38961	-1.30442	0.000192819	0.00737976
ZNF215	-1.27921	0.000192588	0.00737976
HPS6	-1.23325	0.000192854	0.00737976
CDAN1	-1.14813	0.000192598	0.00737976
DIO3OS	-1.39508	0.000193285	0.00738282
BX648855	-1.24005	0.000193605	0.00738282
GADD45B	3.58344	0.000193647	0.00738282
A_32_P32463	1.23054	0.000194912	0.00742195
A_24_P931939	-1.26423	0.000195347	0.00742939
ZNF571	-1.22554	0.000195592	0.00742964
THC2272172	-1.3599	0.000196055	0.00743813
KLF7	1.3376	0.000196787	0.00745678
BC041459	-1.30991	0.000197759	0.0074845
THC2390143	-1.447	0.000198641	0.0074905
ZNFN1A1	-1.22221	0.00019822	0.0074905
SYT3	1.23884	0.000198406	0.0074905
ENST00000305752	-1.16327	0.000199379	0.00750922
CHRNB1	-1.15876	0.000199704	0.00751235
A_32_P8371	-1.37356	0.000200927	0.00753048
A_32_P6452	-1.36905	0.000201389	0.00753048
AL110130	-1.35544	0.00020164	0.00753048
ZNF587	-1.20633	0.000200837	0.00753048
FOXL1	1.27866	0.000201423	0.00753048
ENST00000326470	1.31671	0.000201213	0.00753048
SSTR2	1.94483	0.000202109	0.00753893
AL359596	-1.2664	0.000203409	0.00756927
RBM12B	-1.23414	0.00020332	0.00756927
A_32_P10557	-1.11388	0.000206252	0.00766513
AF320072	1.22727	0.000206479	0.00766513
SIX3	1.33498	0.000207245	0.0076844
SPHK1	1.44438	0.000207553	0.00768664
AK021668	-1.35823	0.000208264	0.00769463
PVRL2	1.31625	0.000208176	0.00769463
A_32_P80523	-1.45684	0.000209205	0.00771105
AY029066	1.25385	0.000209064	0.00771105
AK022430	-1.40123	0.000209563	0.00771508
A_24_P513764	1.25058	0.000210107	0.00772598
ENST00000299289	-1.382	0.000211176	0.00774472
WDR81	-1.16845	0.000210929	0.00774472
ATF7	1.15565	0.000211365	0.00774472
CR606969	-1.30035	0.000211957	0.00775726
A_32_P110086	-1.30652	0.000212924	0.00778349
THC2376198	-1.33659	0.00021396	0.0078122
ENST00000259219	-2.77726	0.000214985	0.00783297
C8ORFK32	1.2239	0.000215034	0.00783297
THC2331610	1.3873	0.000215312	0.00783391
SOD2	1.60485	0.000215588	0.00783479
GDF10	-1.67243	0.000217134	0.00786293
BX647614	-1.33847	0.000218043	0.00786293
ENST00000301042	-1.14707	0.000217976	0.00786293
KLF11	1.2374	0.000217561	0.00786293
CR595983	1.31417	0.000217665	0.00786293
PPARGC1A	1.43634	0.000217636	0.00786293
GPRC5A	1.84047	0.000218134	0.00786293
FLJ45187	-1.43038	0.0002194	0.00786298
HOXA10	-1.32516	0.000219173	0.00786298
FLJ12716	-1.16866	0.000219056	0.00786298
BE646426	1.27904	0.000218608	0.00786298
PPP1R9A	1.34472	0.000219016	0.00786298
SYVN1	-1.15347	0.000220194	0.00788234
ENST00000341154	-1.18302	0.000220795	0.00789475
CCDC76	-1.24474	0.000221317	0.00789526
NR4A2	2.72722	0.000221236	0.00789526
DSCR1L2	1.32399	0.000221744	0.00790139
DFNB59	-1.2588	0.000222544	0.00791562
ZC3HAV1L	-1.16672	0.000222907	0.00791562
THC2319755	1.50677	0.000222851	0.00791562
BRF2	-1.34815	0.00022509	0.0079792
CROP	-1.1986	0.00022624	0.0079792
LOC646561	1.18412	0.00022581	0.0079792
CA419778	1.23634	0.000225597	0.0079792
A_24_P753760	1.32107	0.000226207	0.0079792
CYSLTR2	1.33212	0.00022627	0.0079792
ENST00000366930	1.47239	0.000226495	0.0079792
HARSL	-1.18662	0.00022729	0.00798908
ZNF223	-1.17356	0.000227234	0.00798908
THC2308876	-1.5268	0.000229614	0.00801843
ENST00000238789	-1.20325	0.000229931	0.00801843
ACYP1	-1.19084	0.000229796	0.00801843
CECR1	1.19652	0.00022927	0.00801843
THC2378689	1.34266	0.000229211	0.00801843
DYRK3	1.57847	0.000228772	0.00801843
THC2343936	1.79407	0.000229705	0.00801843
BX100437	-1.22797	0.000230514	0.00802976
A_24_P934975	1.42338	0.000230807	0.00803096
GIMAP1	-1.38623	0.000233177	0.00804142
THC2274334	-1.28063	0.000233055	0.00804142
KCTD6	-1.19791	0.000232518	0.00804142
THC2283850	-1.16614	0.000232536	0.00804142
SLC13A4	-1.1176	0.000232299	0.00804142
THC2324430	1.26375	0.000233143	0.00804142
BG547692	1.28274	0.000233437	0.00804142
ENST00000245185	1.82139	0.000231862	0.00804142
MAFF	2.60292	0.000233391	0.00804142
SMARCAD1	-1.18473	0.00023533	0.00809765
TMEM1	-1.15079	0.000235664	0.00810016
THC2285720	-1.32476	0.000236272	0.00811211
AK021866	-1.26885	0.000237105	0.00812527
BM932296	-1.23597	0.000237179	0.00812527
A_32_P84119	-1.22452	0.00023812	0.00814851
ENST00000358293	-1.32474	0.000238432	0.00815021
AK126439	-1.20794	0.000239016	0.00816122
BX648207	-1.22969	0.000240022	0.00818142
TUBB4	1.31869	0.000240135	0.00818142
BC033590	-1.44352	0.000241072	0.0081954
AL711212	-1.41257	0.000241018	0.0081954
AK027667	-1.50693	0.000241918	0.00820524
TIGD2	-1.26603	0.000242154	0.00820524
A_24_P927339	-1.15884	0.000241985	0.00820524
OSMR	1.25884	0.000242681	0.00821415
C1orf163	-1.21185	0.000243763	0.00823282
AK026687	-1.19535	0.000243727	0.00823282
NP	2.48242	0.000245036	0.00826685
HSP90AA1	1.26372	0.00024709	0.00831059
C6orf188	1.30639	0.000247135	0.00831059
PDE5A	1.49396	0.00024665	0.00831059
ENST00000330777	-1.3508	0.000248668	0.00832525
AK055067	-1.28525	0.000248518	0.00832525
THC2406779	-1.28094	0.000248696	0.00832525
THC2448843	-1.27403	0.000248637	0.00832525
MGC39900	-1.26261	0.000248911	0.00832525
OTOS	1.30161	0.000249664	0.00834145
RP11-535K18.3	1.21031	0.000251231	0.00838481
KCNG1	-2.69241	0.000252317	0.008394
DKFZp762I137	-1.28285	0.000252289	0.008394
BBS10	-1.25331	0.000252103	0.008394
ENST00000308077	-1.26529	0.00025302	0.00839653
AKR1C3	1.37731	0.000253204	0.00839653
A_32_P49035	1.57756	0.000253107	0.00839653
ZBTB34	-1.163	0.000254255	0.00842242
IL2RB	-1.56688	0.000255119	0.00843303
THC2438685	-1.21492	0.000255078	0.00843303
THC2375651	-1.33431	0.000255677	0.00844251
BC032118	1.23016	0.000256026	0.00844505
RPESP	1.59688	0.000257245	0.00847626
FBLN5	-1.40558	0.000260089	0.00856088
AK074670	-1.37616	0.000261311	0.00859202
THC2278254	-1.34593	0.000262983	0.00860149
THC2263389	-1.26041	0.00026212	0.00860149
MGC52110	-1.22755	0.000262482	0.00860149
A_24_P917363	-1.1658	0.000262848	0.00860149
SMAD7	1.37421	0.000262532	0.00860149
HAS2	1.60304	0.00026569	0.00868088
KCNAB1	1.50466	0.000266352	0.00869338
TTLL7	1.43921	0.000266864	0.00870095
LRRC8C	1.25196	0.000267276	0.00870525
RIPK1	1.43815	0.000267674	0.00870907
FLJ38451	-1.31191	0.000268044	0.008712
THC2446265	-1.18961	0.000270968	0.00878865
TP53INP2	1.39823	0.000270744	0.00878865
AW751974	-1.33945	0.000272019	0.00879517
CCNA2	-1.11989	0.00027191	0.00879517
MAPT	1.32029	0.000271964	0.00879517
ZNF306	-1.25657	0.000273299	0.0088274
AW833935	1.52354	0.000273693	0.00883095
THC2407189	1.21087	0.000274637	0.0088522
THC2438117	-1.19076	0.000277238	0.00889913
C9orf23	-1.18415	0.000277011	0.00889913
SCYL3	-1.17366	0.000277016	0.00889913
PSMD12	1.1689	0.000277203	0.00889913
EXOSC9	1.19911	0.000278151	0.00891921
ROR1	-1.31163	0.00027875	0.00892919
ZNF551	-1.17927	0.000279224	0.00893518
FAM118A	1.18196	0.000279631	0.00893899
BTN3A3	-1.17988	0.000280023	0.00894231
ANGEL1	-1.15046	0.000281844	0.00899122
CARD12	-1.28062	0.00028239	0.00899942
FLJ36208	-1.2173	0.000286064	0.00910714
C16orf51	-1.18045	0.000286573	0.00911402
FOXC2	1.15309	0.000287369	0.00913
KLF9	1.62927	0.000288823	0.00916681
CDH3	-1.6058	0.000289637	0.00918326
ELK3	1.23035	0.000293425	0.0092939
SORCS2	-1.56508	0.000295167	0.00931922
AK124166	-1.26871	0.000294955	0.00931922
KLF14	1.26164	0.000295425	0.00931922
RHOQ	1.34004	0.000295183	0.00931922
MS4A2	-1.6046	0.000297921	0.0093505
KIF1C	1.16438	0.000296854	0.0093505
A_23_P21882	1.35228	0.000297795	0.0093505
STK17B	1.45639	0.000297696	0.0093505
NFIL3	2.15287	0.000297827	0.0093505
C6orf134	-1.15337	0.000300857	0.00943314
LOC285989	-1.19811	0.000302028	0.00946031
TNFRSF8	-1.19579	0.00030295	0.00947962
AF161344	1.13165	0.000303668	0.00949252
MIDN	1.38707	0.00030398	0.00949272
FLJ37953	-1.16209	0.000304402	0.00949638
ENST00000310492	-1.15391	0.000305896	0.00953339
BC034428	-1.3223	0.000306923	0.00954626
ZNF57	-1.29717	0.000306631	0.00954626
RORC	1.22627	0.000308771	0.00959414
ENST00000378536	1.21516	0.000309586	0.00960984
RP13-297E16.1	-1.12373	0.000310074	0.00961538
PBEF1	2.27989	0.000310735	0.00962627
NKG7	-1.47013	0.000311848	0.00965114
CA441361	1.20332	0.000313325	0.00967844
THC2331437	1.3513	0.000313353	0.00967844
ENST00000354271	1.15822	0.000313694	0.00967936
THC2283340	-1.20472	0.000314644	0.00968942
ENST00000355793	1.26266	0.000314358	0.00968942
ARMC5	1.2102	0.000315422	0.00969138
ARG2	1.38379	0.000315564	0.00969138
DUSP5	2.07844	0.000315643	0.00969138
C12orf28	1.26513	0.000316952	0.00972195
STK32B	-1.22363	0.000317748	0.00973674
CR590573	-1.28932	0.000319024	0.00974701
THC2409569	-1.2651	0.000318762	0.00974701
A_24_P127517	1.28712	0.000318424	0.00974701
CREM	1.52823	0.000319754	0.00975972
ENST00000304963	1.48295	0.000320274	0.00976601
SYT1	1.47001	0.000320858	0.00977421
A_23_P213350	1.2631	0.000321673	0.00978945
THC2411930	-1.2992	0.000322235	0.00979696
RAB27A	1.22778	0.000322826	0.00980532
AK021467	-1.37131	0.000325498	0.00987684
KIAA1713	-1.28013	0.000326353	0.0098769
A_32_P10831	-1.26207	0.000326565	0.0098769
LOC144233	-1.2308	0.000326772	0.0098769
SENP8	-1.18767	0.00032658	0.0098769
THC2446045	-1.47625	0.00032953	0.00994093
ACSS1	-1.20937	0.000329394	0.00994093
THC2440787	-1.36955	0.000331152	0.00998018
HDAC4	-1.22521	0.000334055	0.0100579
CGNL1	-1.44259	0.000335078	0.0100789
BC045174	-1.15628	0.000335689	0.0100876
ZBED5	-1.20422	0.000336569	0.0100945
BC031876	-1.1691	0.00033647	0.0100945
AK054605	-1.19457	0.000338277	0.0101359
KIAA1655	-1.20952	0.000339679	0.0101681
ENST00000379616	1.66318	0.000340503	0.010183
SASH1	1.28156	0.000341421	0.0102006
BC030813	-3.22392	0.000342658	0.0102261
POLG2	-1.24732	0.000344317	0.0102261
AF217973	-1.1657	0.000344578	0.0102261
ZNF607	-1.14501	0.000344034	0.0102261
SYTL2	1.43745	0.000343704	0.0102261
EGR3	2.57861	0.000344308	0.0102261
RGS16	3.28141	0.000344558	0.0102261
THC2373936	-1.32235	0.000346526	0.0102741
SNAP25	-1.34113	0.000349718	0.0102988
THC2400562	-1.31363	0.000348544	0.0102988
METTL7A	-1.27675	0.000349511	0.0102988
AI911989	-1.26752	0.000348385	0.0102988
ZNF350	-1.25265	0.000349453	0.0102988
A_32_P211683	-1.21126	0.000349356	0.0102988
AK023682	-1.20021	0.000350674	0.0102988
THC2382540	-1.15501	0.00034927	0.0102988
A_24_P783679	1.24398	0.0003504	0.0102988
ENST00000324076	1.34217	0.000350412	0.0102988
ZNF319	-1.28693	0.00035129	0.0103072
AI571129	-1.38948	0.000351782	0.0103084
ZNF250	-1.17902	0.000352094	0.0103084
AF119905	1.15565	0.000352346	0.0103084
PRKAA1	1.17021	0.00035266	0.0103084
BF801333	-1.25946	0.000353894	0.0103348
IGF1R	1.27413	0.000355218	0.0103637
LONRF2	-1.74124	0.000356429	0.0103893
WDR89	-1.14425	0.000357777	0.0104121
LHX9	1.12317	0.000357882	0.0104121
ZNF331	1.76951	0.000359255	0.0104422
LOC440334	-1.22044	0.000359739	0.0104466
ERN1	1.26567	0.000360517	0.0104503
PDK3	1.27613	0.00036054	0.0104503
IAPP	1.30367	0.000361069	0.0104558
A_23_P103951	1.63876	0.000364695	0.010551
MEIS1	-1.36749	0.000367094	0.0106007
ATP1A4	1.23395	0.000366833	0.0106007
THC2439202	-1.18735	0.000368478	0.0106308
LOC51336	-1.14482	0.000368839	0.0106313
THC2282466	-1.38421	0.000369481	0.0106399
HCG12	-1.23589	0.000370149	0.0106493
THC2426594	-1.95605	0.000373663	0.0106728
LOC654434	-1.27938	0.000373462	0.0106728
ZNF354A	-1.16196	0.00037285	0.0106728
BM476468	1.17267	0.000372627	0.0106728
MYO3A	1.18347	0.000371316	0.0106728
FAM102B	1.18657	0.000371881	0.0106728
AIG1	1.21863	0.000372414	0.0106728
CR740121	1.42938	0.000373714	0.0106728
THC2430041	-1.25752	0.000374888	0.0106875
ENOSF1	-1.19824	0.000374916	0.0106875
FLJ13769	-1.25226	0.000375862	0.010699
FOSL1	1.83437	0.000376007	0.010699
THC2241534	1.30458	0.000377272	0.0107252
ZNF519	-1.371	0.000379039	0.0107361
AK097051	-1.22061	0.000378988	0.0107361
C6orf106	1.14435	0.000378031	0.0107361
TNFAIP1	1.28852	0.000378931	0.0107361
MPP7	1.39154	0.000379516	0.0107398
A_24_P920381	1.13542	0.000380038	0.0107448
GNLY	-1.45619	0.000380796	0.0107484
MGC23985	1.21088	0.000380859	0.0107484
C9orf3	1.21695	0.000381698	0.0107624
AK024937	1.24309	0.000382864	0.0107841
BC040678	1.26072	0.000383163	0.0107841
AL136830	1.17293	0.000385209	0.0108319
A_32_P172215	-1.21819	0.000386436	0.0108565
CN414940	-1.35535	0.00038706	0.0108642
ZNF512	-1.19806	0.000390269	0.0109444
ZNF711	-1.12583	0.000391488	0.0109687
LOC390595	-1.19575	0.000393282	0.0110091
TRIM47	1.17058	0.000394787	0.0110412
MCEE	-1.21889	0.000395595	0.0110539
THC2443571	1.1957	0.00039671	0.0110751
CB984746	-1.46756	0.000397225	0.0110795
CDC14C	1.1802	0.000397654	0.0110815
SNAI2	-1.45275	0.000398797	0.0111034
C19orf39	-1.18676	0.000400776	0.0111485
RNF152	1.35397	0.00040139	0.0111556
BC104430	-1.24583	0.000402273	0.0111702
MLSTD1	1.29693	0.000402797	0.0111747
ENST00000373656	-1.2832	0.000403374	0.0111808
SLC25A17	-1.1521	0.00040452	0.0111974
ENST00000382579	-1.12717	0.000404944	0.0111974
FOXC1	1.70166	0.000405055	0.0111974
ZNF180	-1.25103	0.000405639	0.0112036
SLC2A3	2.10218	0.000407392	0.011242
MRPS36	1.11585	0.000409023	0.011277
KCNQ3	1.13205	0.000410405	0.0113051
SIT1	-1.20524	0.000412353	0.0113486
BC089156	-1.2065	0.000412828	0.0113489
AL518525	-1.14384	0.000413096	0.0113489
TMEM157	1.1853	0.000413824	0.0113489
BC038556	1.2298	0.000413568	0.0113489
AK057798	-1.44669	0.000414824	0.0113563
ENST00000314720	-1.25331	0.000414663	0.0113563
A_24_P152278	1.36173	0.000415753	0.0113717
THC2284074	-1.3272	0.000417075	0.0113978
FADS2	-1.41102	0.000421169	0.0114393
THC2373518	-1.33919	0.000420856	0.0114393
LOC148898	-1.33001	0.000420603	0.0114393
SLC40A1	-1.32793	0.000419719	0.0114393
RAB13	1.21036	0.000419982	0.0114393
PSCD2	1.2172	0.0004208	0.0114393
ENST00000278934	1.49966	0.00041942	0.0114393
C1orf156	-1.23575	0.000421787	0.0114415
ALS2CR2	-1.21885	0.000421986	0.0114415
ZNF12	-1.18992	0.000422612	0.0114485
ZNF169	-1.18684	0.000423631	0.0114661
LOC284371	-1.15483	0.000424236	0.0114725
ENST00000369202	-1.20297	0.000426025	0.0114866
ALDH7A1	-1.13586	0.00042553	0.0114866
ENST00000312828	1.32823	0.000426454	0.0114866
TOX	1.41493	0.00042672	0.0114866
THC2313495	1.42154	0.000426605	0.0114866
BCL3	1.74343	0.000426976	0.0114866
SYT5	1.26161	0.00042827	0.0115114
THC2280913	-1.19619	0.000428793	0.0115155
A_23_P44053	-2.25541	0.000429887	0.011525
PCDH1	1.22134	0.000429695	0.011525
ENST00000380874	1.57004	0.000432188	0.0115767
TMEM29	-1.21443	0.000432668	0.0115796
RIBC2	1.31484	0.000433912	0.0116029
CHSY1	1.3899	0.000435471	0.0116345
A_32_P200025	-1.47554	0.000436295	0.0116365
ABCA3	1.23514	0.00043619	0.0116365
FASTKD3	-1.18264	0.000437577	0.0116607
A_24_P931053	-1.21285	0.000441737	0.0117417
PPP1R2	1.14803	0.000441602	0.0117417
KCTD9	1.17718	0.000442126	0.0117417
AF321778	1.2499	0.000441851	0.0117417
ZNF7	-1.17637	0.000444111	0.0117843
MARCKSL1	-1.31906	0.000445191	0.0117984
CR607569	-1.20525	0.000445402	0.0117984
LOC91661	-1.22693	0.000447061	0.0118122
ELL2	1.46647	0.000447027	0.0118122
THC2270231	2.11928	0.000446486	0.0118122
THC2270807	1.14858	0.000448413	0.0118177
A_32_P167723	1.16417	0.000448129	0.0118177
ENST00000374279	1.56428	0.000448361	0.0118177
SPIRE1	1.16425	0.000449811	0.0118445
DACT2	-1.54551	0.000450915	0.0118577
BCR	1.17859	0.000451077	0.0118577
LRMP	-1.3259	0.000451627	0.0118622
PDGFRL	-1.41229	0.000453741	0.0119076
GEMIN6	-1.16078	0.000454773	0.0119247
CR617865	-1.27427	0.000456739	0.0119502
ENST00000332498	1.42999	0.000456903	0.0119502
MCL1	1.67013	0.000456469	0.0119502
ZFP1	-1.16191	0.000458587	0.0119741
CRIP1	1.32446	0.000458221	0.0119741
THC2385388	1.3083	0.000460336	0.0120097
AL833005	1.9862	0.000462585	0.0120583
MT2A	1.78568	0.000463164	0.0120632
GCS1	-1.10497	0.000464629	0.0120912
UBL3	-1.14207	0.000465745	0.0121045
LOC157627	1.32512	0.000465917	0.0121045
ENST00000356555	-1.30715	0.000467807	0.0121304
THC2317278	-1.24815	0.000468439	0.0121304
SAMD3	-1.22563	0.000467428	0.0121304
AK025388	-1.13363	0.000468812	0.0121304
BX095281	1.16317	0.000468867	0.0121304
PLGLA1	-1.21376	0.000469326	0.0121322
JRKL	-1.25451	0.000470828	0.012135
DBN1	-1.21822	0.000470996	0.012135
RP11-50D16.3	-1.19593	0.000470938	0.012135
HDHD2	-1.16859	0.000470094	0.012135
AW327568	1.34433	0.000471964	0.0121499
AF384996	1.20627	0.00047556	0.0122323
GIMAP2	-1.30116	0.00047621	0.0122389
MGC26963	1.32622	0.000477687	0.0122667
THC2344956	-1.49559	0.000481733	0.0123583
BM929941	-1.32111	0.00048205	0.0123583
THC2280689	-1.24413	0.000483571	0.0123871
STX11	1.26186	0.000484156	0.0123918
AK090762	-1.1634	0.000485373	0.0124128
LOC285908	-1.18757	0.000485774	0.0124128
A_32_P169692	-1.18182	0.000486689	0.0124207
ENST00000376356	-1.17783	0.000486884	0.0124207
CR594281	-1.27822	0.000488908	0.0124245
AI525856	-1.2093	0.00048903	0.0124245
ENST00000265149	-1.1815	0.000487716	0.0124245
DCUN1D3	1.35783	0.000488225	0.0124245
LOH3CR2A	1.78014	0.000488907	0.0124245
PPP2R1B	1.18252	0.000494603	0.0125558
BU153693	-1.17017	0.000495481	0.0125678
FLJ11235	1.15545	0.000496814	0.0125914
THC2312756	-1.4152	0.000497372	0.0125952
ZNF443	-1.18858	0.000500107	0.012648
RECQL5	-1.11703	0.000500269	0.012648
ATP1A3	1.22454	0.000501943	0.01268
MGC16384	-1.54126	0.000502377	0.0126806
RAB18	1.20798	0.000503257	0.0126822
CYCS	1.27214	0.000503128	0.0126822
BC017937	-1.18915	0.000505106	0.0127185
ENSA	1.17415	0.000506135	0.0127341
A_32_P73707	-1.14538	0.000507202	0.0127403
B3GALNT2	1.30725	0.000506947	0.0127403
ZBTB11	-1.16782	0.000508514	0.0127424
GRAMD1A	1.24148	0.000507805	0.0127424
BQ002790	1.52526	0.000508366	0.0127424
HSPB8	1.65458	0.000511248	0.0128006
A_32_P194102	-1.1288	0.000512956	0.012818
HIPK3	1.25856	0.000513132	0.012818
ADAMTS4	3.69142	0.00051318	0.012818
AK096415	-1.23219	0.000514719	0.0128461
ATP8B1	1.22906	0.000516266	0.0128743
A_32_P108396	-1.44662	0.000517011	0.0128826
BM930248	1.41984	0.000517814	0.0128922
ENST00000324677	1.27196	0.000518736	0.0129048
STAT3	1.17485	0.000519708	0.0129187
CDC42SE1	1.19559	0.000521567	0.0129545
IGJ	-2.64167	0.000522862	0.0129763
CR625942	-1.19802	0.000523515	0.0129822
ENST00000295410	-2.66315	0.000524305	0.0129914
AK125176	-1.4981	0.000527417	0.0130277
DET1	-1.22641	0.000526332	0.0130277
AK092846	-1.13975	0.000526922	0.0130277
GJA4	1.46168	0.000527449	0.0130277
BG462058	1.1406	0.000530098	0.0130828
THC2383106	-1.27945	0.000532943	0.0131321
CR617352	-1.13808	0.000532569	0.0131321
AK021744	-1.3048	0.000533911	0.0131456
CHL1	1.18523	0.000534556	0.013151
SLCO2B1	-1.27212	0.000536491	0.0131674
AK075052	-1.25509	0.000535928	0.0131674
RPS18	-1.14371	0.000536917	0.0131674
ZNRF2	1.16804	0.000536857	0.0131674
GCN5L2	-1.24528	0.000537413	0.0131692
ENST00000312412	-1.20958	0.000539036	0.0131985
ADAM6	1.13007	0.000539504	0.0131996
AK093521	-1.43732	0.000541659	0.0132003
GIMAP7	-1.38291	0.000540015	0.0132003
C8orf30A	-1.18817	0.000541594	0.0132003
NUP210	-1.1395	0.000541554	0.0132003
THC2313756	1.20957	0.000540624	0.0132003
ARVCF	1.32012	0.00054392	0.013245
ZNF596	-1.15175	0.000544937	0.0132491
KRTAP8-1	1.35919	0.000544762	0.0132491
CR590862	-1.18151	0.000545539	0.0132533
GSDML	-1.17909	0.000546944	0.0132771
DYNLT3	1.16968	0.000548651	0.0133061
MT1B	1.68777	0.000548995	0.0133061
BX111338	-1.18406	0.000552664	0.0133717
C1orf52	1.17263	0.000553061	0.0133717
CD93	1.32212	0.000553425	0.0133717
CRIM1	1.4096	0.000552524	0.0133717
NCOA7	1.60802	0.000554445	0.0133859
THC2339776	-1.20444	0.000555584	0.013403
TSHZ2	-1.23926	0.000556197	0.0134074
AK022299	-1.2516	0.000556673	0.0134085
PTDSR	1.24908	0.000557813	0.0134216
THC2336713	1.32666	0.000558083	0.0134216
C8orf4	1.5872	0.000560851	0.0134778
SIPA1L1	1.22702	0.000562439	0.0135055
BC067908	-1.32486	0.000563711	0.0135256
HOXB6	-1.36477	0.000566138	0.0135352
THC2379429	-1.23758	0.000566761	0.0135352
ENST00000283760	-1.22105	0.000566685	0.0135352
BTBD15	1.13052	0.000565759	0.0135352
C14orf4	1.18019	0.000566355	0.0135352
ZNF364	1.20746	0.000567161	0.0135352
ABLIM2	1.29671	0.000565178	0.0135352
PMS1	-1.17667	0.000570796	0.0136115
SETD5	-1.11897	0.000572393	0.0136391
LOC400506	-1.32726	0.000574983	0.0136467
AL832717	-1.26096	0.00057414	0.0136467
ITGA10	1.14819	0.000573628	0.0136467
A_32_P11501	1.28272	0.000574981	0.0136467
KIAA1922	1.34993	0.000573246	0.0136467
ETS2	1.4647	0.000575349	0.0136467
IL1R1	1.47469	0.000576685	0.013668
GRAMD3	-1.24291	0.000578124	0.0136708
ENST00000254109	-1.24116	0.000577792	0.0136708
CCDC9	1.21082	0.000577348	0.0136708
AY033611	1.2035	0.000580159	0.0137085
A_32_P110016	-1.19702	0.000581243	0.0137237
CR627148	-1.29741	0.000583015	0.0137238
NDST2	-1.17926	0.000582964	0.0137238
PFKFB3	1.36461	0.000582699	0.0137238
ENST00000370703	1.40682	0.000582233	0.0137238
A_24_P487766	1.16819	0.000584305	0.0137438
PLAC8	-1.26494	0.000585092	0.0137519
TSC1	-1.12673	0.000586117	0.0137552
RAB3A	1.15002	0.000586047	0.0137552
LOC284244	-1.31673	0.000587845	0.0137853
GRPEL2	-1.15455	0.000590826	0.0138448
LOC647065	-1.15696	0.000591697	0.0138494
EMP1	2.01508	0.000591914	0.0138494
A_32_P148407	1.13511	0.000592905	0.0138621
A_24_P136415	-1.20472	0.000594264	0.0138834
A_24_P110487	-1.22585	0.000595258	0.0138944
PHLDA1	1.76838	0.000596074	0.0138944
BU943730	2.32217	0.00059565	0.0138944
THC2337454	-1.16869	0.00059739	0.0139122
ENST00000321892	1.16713	0.000597734	0.0139122
THC2373490	-1.19893	0.000598392	0.0139171
ENST00000258884	-1.28057	0.000601292	0.0139636
WIF1	-1.15229	0.000601035	0.0139636
BC029907	-1.37499	0.000603627	0.0139865
ATP6V0E2L	1.15982	0.000603239	0.0139865
FADS3	1.21897	0.000603209	0.0139865
CCDC117	-1.17198	0.000604559	0.0139977
USPL1	-1.14662	0.000606078	0.0140119
GABARAPL1	1.29917	0.000605887	0.0140119
WNT2	-1.44991	0.000608261	0.0140179
LOC554206	-1.25119	0.000607808	0.0140179
ZNF595	-1.13436	0.000608479	0.0140179
SCAP2	1.20552	0.00060859	0.0140179
TM4SF1	1.51602	0.000607914	0.0140179
TMEM30A	1.13134	0.000609642	0.0140317
THC2444209	-1.91627	0.000610344	0.0140339
AK022364	-1.20568	0.000610639	0.0140339
THC2385462	1.41632	0.000611662	0.014047
BACH1	1.25211	0.00061364	0.014082
RP11-93B10.1	-1.17046	0.000617995	0.0141506
PEX16	1.16508	0.000617179	0.0141506
HAPLN3	1.32334	0.000617925	0.0141506
ZNF420	-1.22059	0.000619354	0.0141625
TBC1D24	-1.15984	0.000619427	0.0141625
TAS2R10	-1.26934	0.000621803	0.0141959
UBE2D3	1.14267	0.000621586	0.0141959
A_24_P943429	-1.24483	0.000622709	0.0142023
ZFAND5	1.23374	0.000622997	0.0142023
LINS1	-1.13877	0.00062619	0.0142646
FLJ14107	1.14901	0.000627031	0.0142733
AK096401	-1.15483	0.000627927	0.0142833
GAS1	-1.59875	0.000635343	0.0144308
C12orf11	-1.18288	0.00063492	0.0144308
THC2441937	1.31232	0.000636474	0.014446
ZNF397	-1.19685	0.000636972	0.0144467
THC2406727	-1.24627	0.000639437	0.0144815
RNASEL	-1.24274	0.000639293	0.0144815
BC030993	-1.31189	0.000640601	0.0144973
MGC13138	-1.16041	0.000642145	0.0145111
CPEB2	1.20122	0.000641799	0.0145111
THC2376737	-1.31103	0.000645252	0.0145601
PCF11	1.24555	0.000644877	0.0145601
AK090827	-1.28539	0.000647251	0.0145902
MRM1	-1.22846	0.000647525	0.0145902
THC2316043	-1.27665	0.000648849	0.0146094
SFT2D3	-1.17566	0.000650194	0.0146291
BC017770	1.23457	0.000651446	0.0146467
ALDH5A1	-1.17077	0.00065431	0.014658
ENST00000356177	1.13258	0.000654171	0.014658
DDEF1	1.18844	0.000652988	0.014658
ENST00000251847	1.23403	0.000654124	0.014658
MT1H	1.59381	0.000652749	0.014658
MGC62100	1.13978	0.000658832	0.0147487
FRS3	-1.16448	0.000660941	0.0147853
THC2436786	1.13174	0.000662529	0.0148102
THC2389705	-1.38768	0.00066306	0.0148114
UBE2J1	1.26937	0.000664557	0.0148341
LOC646326	-1.37397	0.000666859	0.0148396
THC2440634	-1.36851	0.000667575	0.0148396
AK123750	-1.23306	0.000666399	0.0148396
FEM1B	1.1972	0.000667668	0.0148396
THC2336839	1.247	0.000666601	0.0148396
ARPM1	1.29325	0.000666827	0.0148396
THC2415133	-1.17561	0.00066914	0.0148617
CNTFR	-1.39509	0.000670306	0.014877
C1orf174	-1.10088	0.000672544	0.014916
A_24_P911378	1.27151	0.000674083	0.0149395
FGF9	-1.84392	0.000675016	0.0149495
THC2304444	-1.15467	0.000676521	0.0149721
PTPRCAP	-1.20959	0.000683053	0.0151059
A_32_P222241	-1.36534	0.000684265	0.0151082
CFDP1	-1.14275	0.000684881	0.0151082
TSSC4	1.15493	0.000685102	0.0151082
MGC42367	1.23081	0.00068457	0.0151082
NPL	-1.23822	0.000685679	0.0151102
THC2290002	-1.44666	0.000687832	0.0151469
PPP1R15A	1.80216	0.00068887	0.0151591
ENST00000258457	-1.24525	0.00069317	0.0152032
JAKMIP2	-1.23421	0.000692518	0.0152032
FLJ11171	-1.1633	0.000693398	0.0152032
LOC340061	1.33262	0.000693584	0.0152032
HIST1H4A	1.57021	0.000692744	0.0152032
MT1G	1.72278	0.000693812	0.0152032
ENST00000343253	-1.19387	0.000694394	0.0152052
THC2445939	1.26462	0.000695479	0.0152182
BC032451	-2.46486	0.000698257	0.0152683
ATP1A2	1.4069	0.000700514	0.0153069
SHF	-1.25379	0.000701564	0.015319
THC2394812	-1.29067	0.000702777	0.0153347
ACOT7	1.21776	0.000704091	0.0153527
LOC389607	1.36256	0.000704598	0.0153529
MTERFD1	-1.15366	0.000705177	0.0153548
LOC646609	1.31811	0.000705885	0.0153594
IQGAP2	1.28012	0.00071	0.0154382
HES4	1.26877	0.000710787	0.0154445
GSTM5	-1.28655	0.000712639	0.0154631
AK025613	-1.1753	0.000712418	0.0154631
C1orf109	-1.15614	0.000714739	0.0154978
MAP2	1.27305	0.000715725	0.0155084
DKFZp547J222	-1.21723	0.000717237	0.0155195
LOC643950	1.21996	0.000716821	0.0155195
BI497361	-1.34834	0.000718104	0.0155274
MT1X	1.63279	0.000719912	0.0155557
AK021531	-1.78086	0.000723441	0.0155899
BC048201	-1.51047	0.000724723	0.0155899
DUSP5P	-1.35589	0.000725507	0.0155899
A_32_P71113	-1.20823	0.000724101	0.0155899
FLT1	1.41621	0.000722739	0.0155899
XKR4	1.45835	0.000722913	0.0155899
ZNF659	1.48224	0.000723567	0.0155899
MT1L	1.63421	0.000725075	0.0155899
ATP5S	1.11763	0.000727603	0.0156133
CDKN1A	2.49042	0.000727429	0.0156133
CB529149	1.16595	0.000729145	0.0156356
VASH2	-1.30267	0.000730549	0.0156445
W95609	1.18419	0.000730568	0.0156445
A_23_P89841	-1.31436	0.00073275	0.0156763
CA433167	-1.20993	0.000733062	0.0156763
AK090670	-2.13801	0.000734397	0.0156938
PDE3A	1.44518	0.000734888	0.0156938
DDX17	-1.28951	0.000738889	0.0157393
ZNF228	-1.2551	0.000738609	0.0157393
RNF146	-1.23195	0.000739305	0.0157393
NOVA1	-1.21412	0.000740197	0.0157393
ZNF278	-1.1534	0.000740675	0.0157393
LAMA3	1.17099	0.000739968	0.0157393
MAP2K3	1.32552	0.00074107	0.0157393
GPR56	1.3805	0.000738986	0.0157393
KIAA0753	-1.16058	0.000742208	0.0157526
DB518505	1.44188	0.000744617	0.0157842
CLIC6	1.9962	0.000744713	0.0157842
ZNF75	-1.1357	0.000747697	0.0158367
AA630774	1.18482	0.000748376	0.0158403
COL4A5	-1.22627	0.000752705	0.0159211
ENST00000378770	1.1855	0.000757267	0.0159958
AW994273	1.64547	0.000757106	0.0159958
PI16	-1.34787	0.000760472	0.0160526
ROBO1	-1.15141	0.000766092	0.0161602
ZNF320	-1.15835	0.000769676	0.0162248
LOC145758	-1.18581	0.000772606	0.0162755
UGCG	1.31585	0.000774787	0.0163104
DPP6	-2.2209	0.000775684	0.0163182
ZNF627	-1.25699	0.00077682	0.0163201
GLT28D1	1.16444	0.00077656	0.0163201
AK057981	1.18686	0.000781491	0.0163989
A_24_P925559	1.25295	0.000781631	0.0163989
T15787	1.15513	0.000782217	0.0164002
AK092801	-1.21267	0.000787041	0.0164902
RAC2	-1.31366	0.000790786	0.0165069
THC2437822	-1.15942	0.000789297	0.0165069
ENST00000335995	-1.15921	0.000791027	0.0165069
A_32_P142407	1.13721	0.000789299	0.0165069
THC2410705	1.14946	0.000790868	0.0165069
GNB4	1.1643	0.000790608	0.0165069
A_32_P52046	-1.13597	0.000795509	0.0165893
THC2284350	-1.33299	0.000798747	0.0166031
HOXA11S	-1.3092	0.000797812	0.0166031
MYOZ3	-1.23071	0.000798585	0.0166031
AK090405	1.24804	0.000798841	0.0166031
BM129308	1.92652	0.000797708	0.0166031
FLJ16165	-1.14288	0.00079987	0.0166133
POLE2	-1.17999	0.000802536	0.0166576
DIDO1	-1.13959	0.00080332	0.0166627
LOC284323	-1.20782	0.000803946	0.0166646
VIL2	1.35862	0.00080614	0.0166989
LILRB1	-1.14427	0.000808527	0.0167279
THC2346166	1.22105	0.000808613	0.0167279
SGIP1	1.31838	0.000809833	0.0167419
M87790	-3.43107	0.000810466	0.0167439
AP1GBP1	-1.15277	0.000814114	0.0168081
H2AFZ	1.23644	0.000815661	0.0168288
SLA	-1.29233	0.000817743	0.0168502
AF086071	-1.21625	0.00081778	0.0168502
AY172962	-3.45098	0.000823268	0.0168688
DB341590	-1.49219	0.000819934	0.0168688
THC2436370	-1.41061	0.000823569	0.0168688
AK128756	-1.29284	0.000820793	0.0168688
TRAIP	-1.20709	0.000822825	0.0168688
PEO1	-1.20257	0.000821219	0.0168688
PMS2L5	-1.15692	0.000822071	0.0168688
SLITRK1	-1.13157	0.000821752	0.0168688
GADD45A	1.5138	0.000821182	0.0168688
DDX28	-1.17638	0.000827627	0.0168976
ZC3H10	-1.16033	0.000828264	0.0168976
ZFP161	-1.15669	0.000829327	0.0168976
FLJ37453	-1.14687	0.000829054	0.0168976
MPI	-1.13968	0.000825713	0.0168976
SFTPA1	1.11601	0.000828196	0.0168976
CHD1	1.29943	0.000828979	0.0168976
LRG1	1.60116	0.00082773	0.0168976
AK130486	-1.28169	0.00083309	0.0169087
BX414807	-1.25936	0.000834102	0.0169087
IHPK2	-1.21864	0.000834686	0.0169087
THC2269397	-1.19086	0.000832521	0.0169087
LSS	-1.17699	0.000836404	0.0169087
LRIG2	-1.16142	0.000833323	0.0169087
THC2404242	-1.15341	0.00083525	0.0169087
PURB	1.1139	0.000833256	0.0169087
THC2348993	1.14048	0.000835731	0.0169087
DB040019	1.15131	0.000832091	0.0169087
GNG12	1.16052	0.000834785	0.0169087
BC007549	1.46129	0.00083614	0.0169087
KCTD10	1.17613	0.000838953	0.016932
A_32_P86616	1.18242	0.000839145	0.016932
EBI2	1.63047	0.00083919	0.016932
RARG	-1.21479	0.000840434	0.0169407
DLEC1	-1.10619	0.000840712	0.0169407
BM697215	1.32722	0.00084159	0.0169474
ENST00000228360	-1.36678	0.000844587	0.0169719
PHACS	-1.22355	0.000844992	0.0169719
PPP6C	1.10775	0.000844354	0.0169719
LPGAT1	1.19242	0.00084471	0.0169719
THC2440022	-1.24415	0.000845558	0.0169723
ENST00000360514	-1.20055	0.000846978	0.0169789
AK094334	-1.18884	0.000846901	0.0169789
ANK1	1.23034	0.000848123	0.0169909
C6orf154	-1.28247	0.000851207	0.0170198
RP11-301I17.1	-1.27349	0.000850265	0.0170198
A_24_P488510	-1.24971	0.000850906	0.0170198
IGKC	-2.28653	0.000854906	0.017027
AY358815	-1.47037	0.000853778	0.017027
THC2379201	-1.40131	0.000855759	0.017027
THC2411485	-1.28795	0.000854985	0.017027
ZC3H12D	-1.19963	0.000856223	0.017027
BC028243	-1.17154	0.000852827	0.017027
SIN3B	1.19109	0.000855927	0.017027
PRRX1	1.27329	0.0008537	0.017027
SOX7	1.3453	0.000856517	0.017027
AK124698	1.60788	0.000857051	0.017027
COX7A1	1.2285	0.000858855	0.0170326
HIP1	1.2443	0.000858739	0.0170326
THC2377845	1.38473	0.000858976	0.0170326
C10orf84	1.12595	0.000861283	0.0170675
FAT	1.17061	0.000862059	0.017072
PLEKHQ1	1.34283	0.000862745	0.0170747
NNMT	1.78623	0.000863332	0.0170754
JARID1B	-1.10085	0.000869262	0.0171742
A_32_P32923	1.13326	0.000869433	0.0171742
CCDC41	-1.15785	0.000871126	0.0171858
A_32_P28528	1.11827	0.000870893	0.0171858
GLUD1	1.16535	0.000871681	0.0171858
A_32_P42666	-1.341	0.000873299	0.0172037
C12orf49	1.11487	0.000874231	0.0172037
ACBD5	1.19286	0.000874248	0.0172037
CR601496	-1.26698	0.00088018	0.0173095
THC2282954	-1.4495	0.000880878	0.0173122
CR624880	-1.17145	0.000883561	0.0173441
GCM1	1.13	0.000883618	0.0173441
NRXN2	-1.31916	0.00088493	0.017355
ARL5B	1.46315	0.000885291	0.017355
CRYGS	-1.25795	0.000890437	0.017412
ZNF17	-1.1691	0.000889926	0.017412
SETMAR	-1.16724	0.000890354	0.017412
HMCN2	1.31676	0.000888828	0.017412
FRYL	1.12725	0.000891994	0.0174315
MGC15634	-1.16514	0.000893154	0.0174322
ENST00000328046	1.30585	0.000892871	0.0174322
ENST00000375280	-1.34999	0.000897833	0.0174806
CSTF1	-1.14105	0.000897656	0.0174806
WNT9A	-1.12797	0.000897885	0.0174806
ACOT9	1.15062	0.00089679	0.0174806
TMEM8	1.17292	0.000900147	0.0175137
PTPN21	1.21555	0.000903284	0.0175452
HNT	1.32492	0.000903434	0.0175452
ANXA1	1.34472	0.000903461	0.0175452
SSH1	1.28419	0.000904792	0.0175601
RAB12	1.14483	0.000905721	0.0175672
HTR1E	-1.32306	0.000907343	0.0175876
LOC115648	-1.18053	0.000910268	0.0176333
RNF150	-1.40125	0.000912775	0.0176489
PITPNB	1.18203	0.000912766	0.0176489
IBRDC3	1.34852	0.000912635	0.0176489
DNMBP	-1.15674	0.000913363	0.0176493
AK125221	-1.41541	0.000917348	0.0177153
LOC150223	-1.10456	0.000918628	0.017729
PIK3R1	-1.33912	0.000919772	0.01774
SYNGR1	-1.23586	0.000923625	0.0177964
IQCF2	-1.15766	0.000923844	0.0177964
CR620977	-1.30763	0.000924785	0.0177971
C12orf35	-1.23684	0.000925605	0.0177971
AF136408	-1.1998	0.000926168	0.0177971
CR593388	1.33533	0.000925662	0.0177971
OLIG3	-1.14503	0.000927071	0.0178034
PLEKHB2	1.1438	0.000927963	0.0178096
ZNF365	1.34985	0.000929351	0.0178252
CEBPD	2.22555	0.000929927	0.0178252
NAT9	-1.1214	0.00093179	0.0178494
BX433326	1.21759	0.000932336	0.0178494
CEP135	-1.1381	0.000935808	0.0179048
AK023907	-1.20782	0.000937134	0.0179192
KIAA0859	-1.14806	0.000939214	0.0179386
MAP1D	1.11935	0.000939304	0.0179386
ENST00000263997	-1.15123	0.000941665	0.0179726
VGF	1.12864	0.000948908	0.0180997
MNAB	1.10796	0.00094974	0.0181045
ENST00000374189	1.1568	0.00095048	0.0181075
THC2381800	-1.37452	0.000954049	0.0181532
LOC643336	1.22116	0.000953944	0.0181532
SUHW4	-1.29909	0.000956614	0.0181618
C10orf6	-1.16566	0.000958006	0.0181618
X58809	-1.15529	0.000956285	0.0181618
CCNT1	1.15348	0.000955682	0.0181618
SENP5	1.15506	0.000957745	0.0181618
ZBTB10	1.16536	0.000958005	0.0181618
BQ130701	1.31982	0.000963518	0.0182551
CARS	1.12526	0.000965685	0.018285
A_24_P783433	-1.17851	0.000968224	0.0183108
A_24_P255123	1.24963	0.000968188	0.0183108
ZNF646	-1.15362	0.000969242	0.0183189
THC2416695	-1.19048	0.000971331	0.018319
KIAA1549	-1.17162	0.000971295	0.018319
SNX7	1.12254	0.000970909	0.018319
CSF2RB	1.14754	0.000971725	0.018319
A_24_P358305	1.36626	0.000972197	0.018319
HPS3	-1.17231	0.000973079	0.0183246
CH25H	3.49005	0.000973827	0.0183275
A_23_P403836	1.32458	0.000977242	0.0183807
A_24_P796274	1.19996	0.000981135	0.0184427
ENST00000307840	-2.29299	0.000983964	0.0184736
ENST00000383706	2.50072	0.000983396	0.0184736
PLXDC1	1.37621	0.000985402	0.0184894
MAPKAPK2	1.16366	0.000991079	0.0185847
JUB	-1.24915	0.000993006	0.0186061
CXorf9	-1.21174	0.00099342	0.0186061
ENST00000331696	-2.71945	0.000995743	0.0186384
GENX-3414	1.26021	0.0009974	0.0186582
SLAMF7	-1.68791	0.000999996	0.0186609
ZNF366	-1.26252	0.000999172	0.0186609
GRRP1	1.49796	0.00100055	0.0186609
CDH19	1.73623	0.000998268	0.0186609
BC031319	1.84406	0.00100027	0.0186609
AA987359	1.13077	0.00100253	0.0186867
ODC1	1.27326	0.00100323	0.0186885
SFRP1	-1.50391	0.00100982	0.018755
THC2401493	-1.40561	0.00100785	0.018755
THC2301409	-1.25563	0.00100878	0.018755
PCBD2	-1.15848	0.00100819	0.018755
GK	1.13889	0.00100925	0.018755
TPM3	1.22383	0.00101097	0.0187652
THC2289574	-1.26385	0.00101285	0.0187777
CSH1	1.25856	0.00101271	0.0187777
ENST00000380632	-1.36086	0.00101519	0.0187792
RAI1	-1.234	0.00101472	0.0187792
AA601902	-1.21868	0.00101596	0.0187792
AF118079	-1.18527	0.00101592	0.0187792
PTPN1	1.17219	0.00101536	0.0187792
C8orf79	1.13915	0.00101768	0.0187999
TAS2R5	-1.17535	0.00101832	0.0188005
THC2406011	1.48196	0.00101969	0.0188147
THC2437154	-1.19724	0.00102077	0.0188169
PKD1L1	1.14352	0.00102102	0.0188169
FLJ46385	-1.1836	0.001025	0.0188731
ENST00000297035	-1.1765	0.00102557	0.0188731
ENST00000374558	-1.17586	0.00102677	0.0188731
LRRC8B	1.20305	0.00102711	0.0188731
TRPC3	1.43443	0.00102613	0.0188731
THC2329253	-1.21778	0.00103218	0.0189193
THC2342255	-1.17756	0.00103092	0.0189193
CR612225	-1.11629	0.001032	0.0189193
AI961400	1.09472	0.00103131	0.0189193
NXT1	1.27134	0.00103267	0.0189193
AK057710	-1.18806	0.00103446	0.0189408
A_23_P115902	-1.29092	0.00103532	0.0189456
FLJ34503	-1.46523	0.00103732	0.0189667
PARD6A	1.19976	0.0010377	0.0189667
RRAS2	1.16341	0.00104061	0.0190087
UBE2S	1.20267	0.00104154	0.0190145
MAP3K14	1.19794	0.00104345	0.0190382
THC2376063	-1.29154	0.00104441	0.0190445
FBLN1	-1.32115	0.00104846	0.0190521
AK022268	-1.28114	0.00104707	0.0190521
ANGEL2	-1.16087	0.00104722	0.0190521
HGF	1.15274	0.00104778	0.0190521
PNPLA8	1.19619	0.00104675	0.0190521
DDX3Y	1.20292	0.0010485	0.0190521
KRTAP4-14	1.18803	0.00104935	0.0190563
ENST00000377226	-2.10583	0.00105395	0.0191096
A_24_P914095	-1.1819	0.00105409	0.0191096
LOC150383	-1.17289	0.00105526	0.0191096
AF119906	1.12837	0.00105498	0.0191096
BHLHB2	1.71568	0.00105536	0.0191096
THC2405936	-1.31507	0.00105757	0.0191283
THC2413036	-1.29582	0.00105774	0.0191283
MGC13379	-1.16643	0.00105885	0.0191283
THC2338704	-1.11041	0.00105852	0.0191283
THC2408432	-1.19341	0.00106516	0.0192311
LOC113444	1.16454	0.00106654	0.0192448
CR619760	-1.24852	0.00107302	0.0193506
AK124956	-1.15908	0.00107492	0.0193735
GINS2	-1.19053	0.00107612	0.019381
BTC	1.3659	0.00107658	0.019381
ENST00000366971	-1.17713	0.00107734	0.0193834
LOC285033	-1.13392	0.00108223	0.0194488
NTN2L	1.1255	0.00108179	0.0194488
REEP3	1.20926	0.00108487	0.0194851
LIMD2	-1.16494	0.00108554	0.0194859
ENST00000304389	-1.18342	0.00108621	0.0194866
A_24_P490109	-2.38901	0.00108749	0.0194983
AK057725	-1.17658	0.00109097	0.0195458
MTHFSD	-1.1119	0.0010914	0.0195458
AW389821	-1.3861	0.00109555	0.0195975
BC008476	-1.27276	0.00109527	0.0195975
GLCCI1	-1.27953	0.00109694	0.0196111
SLC22A5	-1.21881	0.00109913	0.0196164
AA707467	1.18832	0.00109855	0.0196164
COCH	1.75351	0.00109862	0.0196164
LOC400657	-1.24152	0.00110173	0.0196403
ITPKC	1.84373	0.00110114	0.0196403
MGC27121	-1.13409	0.00110253	0.0196432
LOC129530	-1.17935	0.00110351	0.0196495
H40632	1.18426	0.00110711	0.0197022
CR614418	1.13598	0.0011088	0.0197211
ZNF425	-1.24205	0.00110978	0.0197271
MESDC1	1.20663	0.001111	0.0197376
AA585242	-1.22511	0.00111544	0.0197959
CR590623	1.19062	0.00111557	0.0197959
HCCA2	1.22953	0.00111619	0.0197959
NSUN5B	-1.19983	0.00111837	0.0198006
CF529682	1.23201	0.00111805	0.0198006
PTGS2	1.9255	0.00111798	0.0198006
DAG1	1.14566	0.00112094	0.0198348
DDX59	1.15449	0.0011224	0.0198436
BX114143	1.45792	0.00112272	0.0198436
AK130896	-1.50938	0.00112646	0.0198787
LOC442245	-1.18359	0.00112765	0.0198787
HPS4	-1.13532	0.001127	0.0198787
THC2436602	-1.12531	0.00112728	0.0198787
MT1A	1.48951	0.0011279	0.0198787
HAND2	-1.46585	0.0011288	0.0198833
THC2368606	-1.22269	0.00113052	0.0199022
FLJ12700	-1.20794	0.00113485	0.0199672
WDR85	-1.12725	0.0011362	0.0199797
DDX5	1.20301	0.00114281	0.0200845
ENST00000359488	-2.34769	0.00114391	0.0200924
RWDD3	-1.1507	0.00114564	0.0201115
MT1F	1.27474	0.00114751	0.020133
ENST00000373264	1.18677	0.00115025	0.0201696
THC2425726	-1.3736	0.00115323	0.0202105
PDDC1	-1.18565	0.00115855	0.0202465
LRRC33	-1.14621	0.00115755	0.0202465
ZNF697	-1.10628	0.00115795	0.0202465
ENST00000373316	1.18267	0.00115682	0.0202465
PTP4A3	1.36969	0.00115743	0.0202465
SOCS4	1.13443	0.00116072	0.0202731
GAST	1.16471	0.00116656	0.0203637
RNF4	-1.12987	0.00116797	0.0203768
RELA	1.14461	0.00116878	0.0203796
THC2343551	-1.19953	0.00116961	0.0203826
DQ145726	-1.17094	0.00118116	0.0205609
MTX1	1.15307	0.00118053	0.0205609
GPR176	1.16871	0.00118208	0.0205653
SUZ12P	-1.24372	0.00118477	0.0206005
BC004287	-1.25847	0.00119004	0.0206352
BX104493	-1.25226	0.00118915	0.0206352
CR626252	1.16212	0.00118885	0.0206352
ETV3	1.16547	0.00119008	0.0206352
PCDH19	1.22098	0.00118831	0.0206352
THC2434739	-1.27764	0.00119245	0.0206417
DKFZP564J0863	1.18515	0.0011924	0.0206417
ZNF267	1.35958	0.00119186	0.0206417
AK024933	-1.44168	0.00119603	0.0206704
THC2334370	-1.33806	0.00119588	0.0206704
AGTRL1	1.18283	0.00119644	0.0206704
DIRAS3	1.82111	0.00119677	0.0206704
LOC202181	-1.34944	0.00120385	0.0207581
PCDHA9	-1.15721	0.00120377	0.0207581
ZNF187	-1.13828	0.00120316	0.0207581
BMX	1.4137	0.00120988	0.0208504
MNAT1	1.14968	0.0012162	0.0209477
C6orf141	-1.30261	0.0012176	0.0209487
TCL1B	-1.1842	0.00121741	0.0209487
ZBTB6	-1.14402	0.00121872	0.0209564
AA897233	-1.11509	0.00122308	0.0210196
TMC8	-1.23534	0.00122553	0.0210385
ENST00000378887	-1.17825	0.001225	0.0210385
STOM	1.16567	0.00122876	0.0210823
TNFRSF10B	1.31942	0.00123083	0.0211061
AW136683	-2.35706	0.00123156	0.0211071
THC2375008	-1.28669	0.00123264	0.0211139
THC2437969	-1.29942	0.00123577	0.0211558
ENST00000371242	-1.29356	0.00124087	0.0212315
CR610885	-1.2211	0.00124198	0.0212388
ZBED3	-1.24668	0.00124411	0.0212635
FLJ20758	-1.13889	0.00124631	0.0212893
THC2280139	-1.21182	0.00124947	0.0213199
CDC42	1.12053	0.00124898	0.0213199
FABP4	-1.3589	0.00125033	0.0213228
PTCD1	-1.20112	0.00125207	0.0213409
FLJ25084	-1.1531	0.0012531	0.0213467
ENST00000369239	-1.28691	0.00125832	0.0214121
SELE	3.5104	0.00125775	0.0214121
SLC22A2	1.14404	0.00125918	0.021415
THC2279933	-1.18002	0.00126098	0.0214253
C6orf128	1.16272	0.00126124	0.0214253
NTN4	1.30299	0.00126254	0.0214253
DGKG	1.30949	0.00126225	0.0214253
AK129542	1.1151	0.00126623	0.0214762
HEATR3	-1.18152	0.00126981	0.021525
A_32_P215745	1.24971	0.00127258	0.0215603
AK023159	-1.29825	0.00127913	0.0216594
AT_nC_3	1.12396	0.00128006	0.0216634
THC2340489	-1.29533	0.00128601	0.0216815
THC2306718	-1.25277	0.00128527	0.0216815
THC2366654	-1.17131	0.00128546	0.0216815
AA912913	-1.12931	0.00128314	0.0216815
MT1E	1.48292	0.00128569	0.0216815
CCNL1	1.57535	0.00128582	0.0216815
LDLR	2.19078	0.00128326	0.0216815
TADA1L	-1.24682	0.00128736	0.0216925
RBM21	-1.11984	0.0012887	0.0217032
FAM53C	1.19383	0.00129354	0.021773
KIAA0256	1.17683	0.0012964	0.0218093
ENST00000295199	1.12163	0.00129968	0.0218408
THC2346734	1.28497	0.00129918	0.0218408
REV3L	-1.39228	0.00130606	0.0219362
FMO5	1.12608	0.00130678	0.0219364
ENST00000354743	1.09271	0.00130918	0.0219647
ATP1B3	1.23432	0.00131063	0.0219773
CDCA4	-1.10957	0.00131347	0.0220043
BCL2L13	1.17319	0.00131366	0.0220043
TSPAN5	-1.18721	0.0013151	0.0220166
ARL4D	-1.35929	0.00131743	0.0220199
GBP2	1.21301	0.00131727	0.0220199
ANK2	1.28312	0.00131715	0.0220199
CA438288	-1.11552	0.00132728	0.0221727
C10orf57	-1.20053	0.00132817	0.0221756
A_24_P24332	1.19893	0.0013311	0.0222127
THC2252089	-1.19564	0.00133376	0.0222451
XCL2	-1.40564	0.00133497	0.022252
ENST00000313153	-1.11956	0.00133561	0.022252
THC2335499	-1.1289	0.00133731	0.0222565
BC008846	-1.12322	0.00133671	0.0222565
QTRTD1	-1.16187	0.0013399	0.0222801
WBSCR18	-1.13335	0.00134016	0.0222801
CCR2	-1.45944	0.00134248	0.0223066
GPR4	1.44539	0.00134634	0.0223589
A_24_P933173	-1.20412	0.00135179	0.0224375
C8orf59	-1.3134	0.0013549	0.0224704
CD743044	1.35727	0.00135548	0.0224704
THC2283842	1.52832	0.00135646	0.0224704
PLAUR	1.61023	0.00135667	0.0224704
FLJ22639	-1.27713	0.00136062	0.0225237
C14orf101	-1.1632	0.00136138	0.0225244
THC2449703	-1.23613	0.00136419	0.0225589
AI791206	-1.51996	0.00137021	0.0226164
MSX1	-1.34225	0.00136894	0.0226164
AK125077	-1.20299	0.00137058	0.0226164
THC2367825	-1.10647	0.00137014	0.0226164
SUSD3	-1.5976	0.00137312	0.0226277
PDIK1L	-1.23523	0.00137283	0.0226277
NUP43	-1.21579	0.00137345	0.0226277
DENND4A	1.14563	0.0013747	0.0226364
BET1	-1.23197	0.00137573	0.0226413
CCDC14	-1.15967	0.0013771	0.0226517
ZNF700	-1.1286	0.00138099	0.0226944
CCRN4L	1.39464	0.00138115	0.0226944
ENST00000310579	-2.42488	0.00138444	0.0227245
FASLG	-1.26928	0.00138436	0.0227245
DHRS9	-1.3714	0.00139399	0.0228571
LIPT1	-1.2261	0.00139374	0.0228571
A_32_P80587	-1.44907	0.00139745	0.0228655
THC2437476	-1.33898	0.00139762	0.0228655
THC2374166	-1.32603	0.00139737	0.0228655
THC2304875	-1.21465	0.00139856	0.0228655
ENST00000361390	1.19621	0.00139787	0.0228655
SLC22A4	1.4853	0.00139892	0.0228655
THC2426708	-1.20059	0.0014021	0.0229054
AF085920	1.20283	0.0014042	0.0229277
GEMIN4	-1.17291	0.00140767	0.0229723
THC2340838	-1.15704	0.00140848	0.0229733
BU632168	1.14684	0.00141167	0.0230133
GPAM	-1.22448	0.00141278	0.0230193
TSPAN6	-1.29919	0.00141458	0.0230366
PKNOX1	-1.14759	0.00141649	0.0230555
THC2442515	-1.13394	0.00141789	0.0230663
TCEB1	1.18119	0.0014188	0.0230691
CTSW	-1.19533	0.00142183	0.0231062
THC2354953	-1.16025	0.0014316	0.0232407
LOC339229	-1.14372	0.00143116	0.0232407
A_24_P713893	1.16257	0.00143348	0.023259
CREB3L2	1.18933	0.0014348	0.0232684
TUBB6	1.28331	0.00143897	0.0233238
OK/SW-CL.89	-1.16963	0.00144244	0.0233678
PNOC	-1.24162	0.00144484	0.0233823
SKI	1.35906	0.00144422	0.0233823
BC092503	1.17672	0.00144625	0.0233929
THBS4	1.9271	0.00145007	0.0234426
ENST00000380410	-1.15706	0.00145383	0.0234911
THC2294276	-1.24654	0.00146686	0.0236894
C12orf44	1.19982	0.00146891	0.0236978
MT1JP	1.85483	0.00146883	0.0236978
AF075045	-1.17233	0.00147066	0.0237087
BLCAP	-1.15823	0.00147163	0.0237087
RASGEF1B	1.22168	0.00147187	0.0237087
THC2439611	-1.17778	0.00147994	0.0237985
FLJ22374	1.14628	0.00148051	0.0237985
IER5	1.23126	0.00147983	0.0237985
CRISPLD2	1.41615	0.00147918	0.0237985
EFNA4	-1.19374	0.00148167	0.0238048
ANKS3	-1.11892	0.00148476	0.0238421
GPR18	-1.25659	0.00148586	0.0238475
DNAHL1	1.17576	0.00148793	0.0238683
ZNF503	-1.36497	0.00148887	0.0238711
BE181768	1.13809	0.00149351	0.0239332
ASB14	-1.13124	0.00149561	0.0239381
MGC13034	1.1195	0.00149502	0.0239381
GABRB2	1.142	0.00149613	0.0239381
AF116642	1.23674	0.00149939	0.0239779
S100A5	1.31548	0.00150303	0.0240237
THC2373308	-1.14831	0.0015061	0.02405
ATP9B	-1.13058	0.00150622	0.02405
A_32_P97373	-1.58306	0.00150867	0.0240649
FAM62B	1.2066	0.00150871	0.0240649
COL11A1	-1.26402	0.0015108	0.0240667
CA432213	1.17816	0.00150964	0.0240667
A_23_P142197	1.25928	0.00151114	0.0240667
AK023328	-1.33638	0.00151258	0.0240773
PEX11A	-1.12787	0.00151683	0.0241203
ENST00000367169	1.40303	0.00151663	0.0241203
MAP1LC3B	1.17938	0.00151942	0.0241415
PCTK2	1.2112	0.00151972	0.0241415
ZNF239	-1.39561	0.00152596	0.0241788
HNMT	-1.20314	0.00152544	0.0241788
C17orf71	-1.14414	0.00152472	0.0241788
MTRF1L	1.18777	0.00152435	0.0241788
PGM2L1	1.40002	0.00152447	0.0241788
EOMES	-1.36709	0.0015269	0.0241813
ENST00000377131	-1.23947	0.00153246	0.024257
TMEM69	-1.14988	0.00153349	0.024261
THC2287647	-1.20561	0.00153772	0.0243155
RGS3	1.21417	0.0015393	0.0243282
LOC644891	-1.29514	0.00154231	0.0243576
CYLD	1.08496	0.00154273	0.0243576
IGHG1	-2.92819	0.00154492	0.0243797
GORASP1	1.12876	0.0015465	0.0243924
FLJ45248	1.39554	0.00155077	0.0244472
ENST00000371327	-1.17916	0.00155221	0.024454
ANGPT4	1.19034	0.00155277	0.024454
A_23_P435390	-3.16829	0.00155424	0.0244647
ENST00000256031	1.27028	0.00155889	0.0245254
KIAA0754	-1.34307	0.00156175	0.024558
LR8	1.37288	0.00156566	0.0246071
CAMK1D	1.23553	0.00156672	0.0246113
C6orf204	1.18687	0.00156767	0.0246137
TTR	1.68626	0.00157213	0.0246713
AW579481	-1.25885	0.00157542	0.0247105
BC037882	-1.17118	0.00157808	0.0247397
TMEM2	1.4163	0.00157909	0.0247431
AK023412	-1.39059	0.00158064	0.0247549
DDEF2	1.1585	0.00158356	0.0247881
TRIM68	-1.18202	0.00158638	0.0248197
ADAMTS16	-1.76813	0.0015872	0.02482
CCR5	-1.42143	0.00159171	0.0248749
AI090268	1.21614	0.00159231	0.0248749
ZNRF1	-1.12429	0.00159388	0.024887
SORBS2	1.38241	0.00159535	0.0248974
MIER2	-1.12493	0.00159958	0.0249508
A_24_P230100	1.19853	0.00160171	0.0249715
AK095564	-1.22175	0.00160423	0.0249984
ZNF83	-1.18724	0.00160564	0.0250077
ACAA1	-1.09294	0.00160664	0.0250107
LOC644433	-1.30144	0.00161102	0.0250417
HCN3	-1.16044	0.00160955	0.0250417
AK027158	-1.14295	0.00161266	0.0250417
[truncated: 29,073 more rows]
