# Supplementary material for: Molecular Landscape of Pelvic Organ Prolapse Provides Insights into Disease Etiology
Source: Int J Mol Sci. 2023 Mar 23;24(7):6087. doi: 10.3390/ijms24076087 (PMC10094264; doi:10.3390/ijms24076087)
Supplement: Supplementary file 1 [file ijms-24-06087-s001.zip › ijms-2158288-supplementary/Supplementary Table S4.xlsx]

## Sheet: Table S4
Gene	Link with POP	FC	P value	Corr P value
AKR1C1	Exome chip (Table 2)	1.55274	0.000173947	0.00700594		All 61 genes from the POP landscape that were differentially expressed between POP and non-POP tissues of 12 premenopausal women with POP (Supplementary Table S3)
FBLN5	Other evidence (Suppl. Table 1)	-1.40558	0.000260089	0.00856088
PLAUR	Other evidence (Suppl. Table 1)	1.61023	0.00135667	0.0224704		P = significant P value after correction
VIM	Other evidence (Suppl. Table 1)	1.19871	0.00288122	0.0358531
RAD52	Exome chip (Table 2)	-1.16429	0.00312369	0.0376725
HIF1A	Other evidence (Suppl. Table 1)	1.19314	0.0101291	0.0795784
ELN	Other evidence (Suppl. Table 1)	1.26945	0.0119456	0.0882065
ECM1	Other evidence (Suppl. Table 1)	1.25731	0.0127886	0.0914752
RRM2	Other evidence (Suppl. Table 1)	-1.13956	0.0155221	0.102971
ARHGEF19	Other evidence (Suppl. Table 1)	-1.20656	0.0156429	0.103593
ITGB1	Other evidence (Suppl. Table 1)	1.15665	0.0177612	0.111972
LOXL1	Other evidence (Suppl. Table 1)	1.21882	0.0371164	0.175841
LAIR2	Other evidence (Suppl. Table 1)	-1.09525	0.05391	0.219425
SCUBE2	Other evidence (Suppl. Table 1)	-1.50611	0.07873	0.272861
MRPL35	Other evidence (Suppl. Table 1)	-1.07457	0.0949813	0.305131
LILRA1	Other evidence (Suppl. Table 1)	1.07467	0.095322	0.305849
METAP1	Other evidence (Suppl. Table 1)	-1.08101	0.0953937	0.305985
TNFRSF10C	Other evidence (Suppl. Table 1)	1.13954	0.101151	0.3168
AKR1D1	Other evidence (Suppl. Table 1)	1.05811	0.102148	0.318797
TFAM	Other evidence (Suppl. Table 1)	-1.06621	0.103844	0.321795
TNFSF10	Other evidence (Suppl. Table 1)	-1.13108	0.103992	0.32206
GPX1	Other evidence (Suppl. Table 1)	1.07249	0.109963	0.33166
MMP1	Other evidence (Suppl. Table 1)	1.13568	0.165487	0.419722
ACN9	Other evidence (Suppl. Table 1)	-1.06788	0.174199	0.431906
ANKLE2	Other evidence (Suppl. Table 1)	-1.04431	0.180626	0.439638
COL1A1	Other evidence (Suppl. Table 1)	-1.28906	0.20255	0.467026
EMILIN1	Other evidence (Suppl. Table 1)	-1.11108	0.210083	0.477101
CASP3	Other evidence (Suppl. Table 1)	1.05333	0.220849	0.490071
COL18A1	Other evidence (Suppl. Table 1)	1.10968	0.263861	0.53919
NACA2	Other evidence (Suppl. Table 1)	-1.04102	0.309721	0.587217
MMP9	Other evidence (Suppl. Table 1)	-1.18026	0.324963	0.601993
ESR1	Other evidence (Suppl. Table 1)	-1.09648	0.337015	0.612848
LOX	Other evidence (Suppl. Table 1)	1.15262	0.340748	0.616144
TGFB1	Other evidence (Suppl. Table 1)	1.03989	0.352762	0.626918
LAMC1	Other evidence (Suppl. Table 1)	1.03688	0.365074	0.638823
HLA-DQA1	Other evidence (Suppl. Table 1)	-1.13513	0.366066	0.639694
FASTKD1	Other evidence (Suppl. Table 1)	-1.04835	0.399113	0.669814
NOP56	Other evidence (Suppl. Table 1)	-1.02455	0.401476	0.671873
WNK1	Other evidence (Suppl. Table 1)	1.03093	0.401871	0.672139
ATP12A	Other evidence (Suppl. Table 1)	1.02926	0.422493	0.688902
SERPINA1	Other evidence (Suppl. Table 1)	-1.07089	0.430756	0.69513
PARP1	Other evidence (Suppl. Table 1)	1.04127	0.43493	0.698214
STYK1	Other evidence (Suppl. Table 1)	-1.05507	0.442088	0.703681
YWHAB	Other evidence (Suppl. Table 1)	1.02048	0.547291	0.783011
MMP2	Other evidence (Suppl. Table 1)	-1.06761	0.556721	0.789096
TIMP1	Other evidence (Suppl. Table 1)	1.04009	0.583249	0.805953
RAGE	Other evidence (Suppl. Table 1)	-1.03117	0.628322	0.833756
COL3A1	Other evidence (Suppl. Table 1)	-1.08285	0.632314	0.835875
PLG	Other evidence (Suppl. Table 1)	-1.01593	0.675219	0.860982
HLA-DQB1	Other evidence (Suppl. Table 1)	-1.02718	0.733348	0.890448
MMP3	Other evidence (Suppl. Table 1)	-1.01664	0.742976	0.895301
ESR2	Other evidence (Suppl. Table 1)	1.01069	0.769248	0.907995
TIMP2	Other evidence (Suppl. Table 1)	-1.01845	0.819336	0.928022
PR	Other evidence (Suppl. Table 1)	-1.02578	0.833543	0.934102
NEB	Other evidence (Suppl. Table 1)	1.016	0.856461	0.943787
AHNAK	Other evidence (Suppl. Table 1)	-1.00591	0.892731	0.959598
MMP8	Other evidence (Suppl. Table 1)	1.00296	0.940498	0.978367
CDH1	Other evidence (Suppl. Table 1)	-1.01336	0.952006	0.981894
GSTP1	Other evidence (Suppl. Table 1)	1.00223	0.962191	0.986299
GGCT	Other evidence (Suppl. Table 1)	0.999328	0.984645	0.994894
BMP1	Other evidence (Suppl. Table 1)	0.99915	0.991646	0.998135
